**Title:** Genetic correlations among brain-behavioral and immune-related phenotypes based on genome-wide association data.

**Author List:** Daniel S. Tylee,<sup>1</sup> Jonathan L. Hess,<sup>1</sup> Muhammad A. Tahir,<sup>1</sup> Esha Sharma,<sup>1</sup> Rainer Malik,<sup>2</sup> Bradford B. Worrall,<sup>3</sup> Andrew J. Levine,<sup>4</sup> Jeremy J. Martinson,<sup>5</sup> Sergey Nejenstev,<sup>6</sup> Doug Speed,<sup>7</sup> Annegret Fischer,<sup>8</sup> Eric Mick,<sup>9</sup> Brian R. Walker,<sup>10</sup> Andrew Crawford,<sup>10,11</sup> Struan F.A. Grant,<sup>12-15</sup> Constantin Polychronakos,<sup>16</sup> Jonathan P. Bradfield,<sup>12,17</sup> Patrick M. A. Sleiman,<sup>12,14</sup> Hakon Hakonarson,<sup>12,14</sup> The METASTROKE Consortium of the International Stroke Genetics Consortium, The Netherlands Twin Registry, The neuroCHARGE Working Group, The Obsessive Compulsive and Tourette Syndrome Working Group of the Psychiatric Genomics Consortium, Stephen V. Faraone,<sup>1</sup> and Stephen J. Glatt.<sup>1</sup>

<sup>1</sup> Psychiatric Genetic Epidemiology & Neurobiology Laboratory (PsychGENe Lab); Departments of Psychiatry and Behavioral Sciences & Neuroscience and Physiology; SUNY Upstate Medical University; Syracuse, NY, U.S.A.

<sup>2</sup> Institute for Stroke and Dementia Research, Klinikum der Universität München, Ludwig-Maximilians-University (LMU), Munich, Germany.

<sup>3</sup> Departments of Neurology and Public Health Sciences, University of Virginia School of Medicine, Charlottesville, VA, U.S.A.

<sup>4</sup> Department of Neurology, David Geffen School of Medicine, University of California Los Angeles, Los Angeles, CA, U.S.A.

<sup>5</sup> Department of Infectious Diseases and Microbiology, Graduate School of Public Health, University of Pittsburgh, PA, U.S.A.

<sup>6</sup> Department of Medicine, University of Cambridge, Cambridge, U.K.

<sup>7</sup> Genetics Institute, University College London, London, WC1E 6BT, U.K.

<sup>8</sup> Institute of Clinical Molecular Biology, Kiel University and University Hospital Schleswig-Holstein, Kiel, Germany.

<sup>9</sup> Department of Quantitative Health Sciences, University of Massachusetts Medical School, Worcester, MA, U.S.A.

<sup>10</sup> BHF Centre for Cardiovascular Science, Queen's Medical Research Institute, University of Edinburgh, Edinburgh, EH16 4TJ, U.K.

<sup>11</sup> School of Social and Community Medicine, MRC Integrated Epidemiology Unit, University of Bristol, Bristol, BS8 2BN, UK

<sup>12</sup> Center for Applied Genomics, Division of Human Genetics, The Children's Hospital of Philadelphia, Philadelphia, PA, U.S.A.

<sup>13</sup> Division of Endocrinology and Diabetes, The Children's Hospital of Philadelphia, Philadelphia, PA, U.S.A.

<sup>14</sup> Department of Pediatrics, Perelman School of Medicine, University of Pennsylvania, Philadelphia, PA, U.S.A.

## Genetic correlations among behavioral and immune phenotypes - 2

<sup>15</sup> Institute of Diabetes, Obesity and Metabolism, Perelman School of Medicine, University of Pennsylvania, Philadelphia, PA, U.S.A.

<sup>16</sup> Endocrine Genetics Laboratory, Department of Pediatrics and the Child Health Program of the Research Institute, McGill University Health Centre, Montreal, Quebec, Canada.

<sup>17</sup> Quantinuum Research LLC, San Diego, CA, U.S.A.

<sup>18</sup> Division of Pulmonary Medicine, The Children's Hospital of Philadelphia, Philadelphia, PA, U.S.A.

<sup>19</sup> K.G. Jebsen Centre for Research on Neuropsychiatric Disorders, University of Bergen, Bergen, Norway

**Target Journal:** Brain, Behavior, and Immunity (Impact 5.89)

## Genetic correlations among behavioral and immune phenotypes - 3

### Abstract

Evidence of altered immune function and inflammatory signaling has been reported in samples of individuals affected by major psychiatric and neurodevelopmental disorders; it remains unclear how these altered immunological states arise, though a genetic basis has been postulated. The present study sought to use existing summary-level data generated from previous genome-wide association studies (GWAS) in order to explore whether common variant genetic risk factors might be shared between a set of psychiatric/neurodevelopmental phenotypes and a set of medical phenotypes enriched with immune and inflammatory processes. Based on the available GWAS summary data, we calculated the estimated heritability for each phenotype and we examined the genetic correlations between pair-wise combinations of phenotypes, using the LD Score Regression method. We observed positive genetic correlations between bipolar disorder and both celiac disease ( $r_g = 0.31 \pm 0.09$ ) and ulcerative colitis ( $r_g = 0.25 \pm 0.06$ ), which survived correction for multiple testing. We also observed several robust genetic correlations amongst the set of medical phenotypes enriched for immune and inflammatory processes. We review the relevant clinical literature and suggest that similarities in common variant genetic diatheses may contribute to increased comorbidity between bipolar and autoimmune/inflammatory conditions involving the gastrointestinal tract. We also discuss the limitations of the present approach and important caveats for interpreting the findings.

## Introduction

The biological bases of major psychiatric and neurodevelopmental disorders have been studied for decades, yet they remain largely unresolved for the majority affected by apparently idiopathic disease. Evidence from both clinical and biomedical literature has demonstrated that samples of individuals with these conditions show differences in circulating immunologic markers, functional capacities of isolated immune cells, and atypical prevalence of clinical immune-related phenotypes, compared to samples of individuals not affected by psychiatric or neurodevelopmental disorder.<sup>1-9</sup> It remains unclear what roles (if any) altered immunologic functions may play within the major psychiatric phenotypes, though plausible mechanisms linking altered immune functions with neurobiological changes have been identified.<sup>10-12</sup> While some studies have already suggested potential genetic bases for the immune-dysregulation observed in a subset of psychiatric patients,<sup>13-16</sup> the extent to which co-occurrence or segregation of clinical phenotypes may be influenced by similarities in genome-wide genetic risk signals warrants further examination. The goal of the present study was to explore the genetic correlations among these phenotypes using summary data from independent genome-wide association studies (GWAS) or GWAS meta-analyses, which shed light on the disease-related risk associated with single nucleotide polymorphisms (SNPs) that are relatively common in population samples. We hypothesized that some phenotype pairs with evidence for clinical comorbidity might also share similarities in their genome-wide association profile (*i.e.* significant positive correlations). On the other hand, negative genetic correlations may highlight phenotype pairs with unexpectedly low rates of clinical comorbidity, or may highlight phenotypes at the opposite ends of a polygenic diathesis.

## Methods

### Literature Search

We searched the published literature (Pubmed, SCOPUS), data repositories (database of Genotypes and Phenotypes; dbGaP) and the downloads page of the Psychiatric Genomics Consortium

website (<https://www.med.unc.edu/pgc/downloads>) to identify phenotypes with potentially usable GWAS and GWAS meta-analysis summary statistics. In order to facilitate cross-study comparison, we utilized studies that reported samples of European ancestry, broadly defined to include Central, Southern and Eastern Europe, Scandinavia, and Western Russia. One exception to this was the selection criteria was PGC-II schizophrenia summary data, which reflects a meta-analysis of 46 European cohorts and 3 cohorts of East Asian ancestry.<sup>17</sup> When multiple studies were identified for a given phenotype, we first pursued the study with the largest effective sample size. For studies identified in the published literature, we contacted corresponding authors to request summary statistics. The full list of phenotypes identified in the search and retained for analyses is shown in Supplementary Table 1, along with identifications of the study cohorts and consortia efforts that generated these data, full citations of the respective publications, and indications of sample size, information regarding genomic inflation, and estimated heritability (described below).

### **GWAS Phenotypes Obtained and Retained For Genetic Correlation**

For our brain- and behavior-related phenotypes, we obtained summary data reflecting studies of alcohol-related problems in youth,<sup>18</sup> Alzheimer's disease,<sup>19</sup> angry temperament,<sup>20</sup> anxiety-spectrum disorders,<sup>21</sup> attention-deficit/hyperactivity disorder (ADHD),<sup>22</sup> autism (PGC download page), borderline personality disorder,<sup>23</sup> bipolar disorder,<sup>24</sup> epilepsy (partial seizures),<sup>25</sup> head circumference,<sup>26</sup> intracranial volume,<sup>27</sup> reading disability and language impairment,<sup>28,29</sup> major depression,<sup>30</sup> obsessive-compulsive disorder (OCD; personal communication from Carol Mathews), personality (5 domains),<sup>31</sup> cigarette smoking (ever-smoked status and cigarettes per day),<sup>32</sup> schizophrenia,<sup>17</sup> substance dependence (including alcohol,<sup>33</sup> opiates,<sup>34</sup> and cocaine<sup>35</sup>), and Tourette Syndrome (personal communication from Carol Mathews). We also included studies of birth weight<sup>36</sup> and length,<sup>37</sup> because of their relevance to intrauterine development and potential relevance to early brain development and neurodevelopmental hypotheses of disorders like schizophrenia and autism. These brain/behavior/development phenotypes were treated as a set in subsequent analyses.

## Genetic correlations among behavioral and immune phenotypes - 6

We obtained GWAS data for a variety of medical conditions, many of which are known or suspected to involve alterations to immune cells and/or inflammatory signaling, as well as several continuously measured immune/inflammatory biomarkers. These included atopic dermatitis,<sup>38</sup> autoimmune hepatitis,<sup>39</sup> blood pressure (systolic, diastolic, mean arterial and pulse pressure),<sup>40,41</sup> celiac disease,<sup>42</sup> coronary artery disease,<sup>43</sup> Crohn's disease,<sup>44</sup> diabetes (type 1<sup>45</sup> and 2<sup>46</sup>), eosinophilic esophagitis,<sup>47</sup> morning plasma cortisol,<sup>48</sup> granulomatosis with polyangiitis,<sup>49</sup> human immunodeficiency virus (HIV) control<sup>50</sup> and HIV-associated sequelae (including dementia, neurocognitive impairment, processing speed, and executive function),<sup>51</sup> IgA nephropathy,<sup>52</sup> myeloid neoplasia,<sup>53</sup> otitis media (chronic),<sup>54</sup> psoriatic arthritis,<sup>55</sup> rheumatoid arthritis,<sup>56</sup> sarcoidosis,<sup>57</sup> systemic sclerosis,<sup>58</sup> stroke (large vessel, small vessel, cardio-embolic, and all subtypes combined),<sup>59,60</sup> systemic lupus erythematosus,<sup>61</sup> susceptibility to pulmonary tuberculosis,<sup>62</sup> and ulcerative colitis.<sup>63</sup> These phenotypes were treated as a set in subsequent analyses.

### Data Pre-Processing and Analysis

All data pre-processing and analyses were performed using tools supplied within the Linkage Disequilibrium (LD) Score Regression software suite (LDSC; <https://github.com/bulik/ldsc>).<sup>64,65</sup> Briefly, this set of tools can be used with existing GWAS summary data in order to (1) distinguish polygenicity from confounding caused by uncontrolled population stratification or cryptic relatedness among samples,<sup>64</sup> (2) estimate the heritability of a given phenotype,<sup>65</sup> and (3) estimate the genetic correlation between two phenotypes based on two separate or related sets of summary statistics.<sup>65</sup> This method relies on adjustment for the linkage between SNPs (*i.e.* covariance caused by genomic proximity); for our analyses, we used the set of LD scores provided by the software's creators, based on the 1000 Genomes Project's European sample (file = eur\_w\_ld\_chr, URL = <https://data.broadinstitute.org/alkesgroup/LDSCORE>). Because minor allele frequencies and imputation quality scores were not available for all the obtained sets of GWAS results, we filtered the GWAS results to retain only single nucleotide polymorphisms (SNPs) that were included within the HapMap3 panel and

## Genetic correlations among behavioral and immune phenotypes - 7

had a minor allele frequency  $\geq 5\%$  within the 1000 Genomes Project Phase 3 European samples.<sup>65</sup>

Additional SNP quality controls (QC) routines followed those implemented by the GWAS authors and the defaults employed with the LDSC *munge\_sumstats.py* function; this function checks alleles to ensure that the supplied alleles match those in the HapMap3 reference panel. For each data set, we estimated the phenotype's heritability using the *ldsc.py* function. The results of this analysis, along with features of each GWAS data set (sample size, number of QC+ SNPs, genomic inflation factor, *etc.*), are shown in Supplementary Table 1. Phenotypes with estimated heritability greater than the error of the estimate were retained for correlational analysis (indicated in Supplementary Table 1); this resulted in the inclusion of seven phenotypes with an effective sample size less than 5000 individuals (indicated in Supplementary Table 1), which was previously recommended as a minimum sample size in order to reduce to error.<sup>65</sup>

Pairwise genetic correlations were assessed between all retained phenotypes based on the intersection of QC-positive SNPs and heatmaps were constructed to depict these relationships. For correlation coefficients returned within the bounds of the LDSC software,  $p$ -values were corrected using the Benjamini-Hochberg (BH) method for the total number of unique tests depicted in each correlation matrix. In subsequent figures, the correlations reaching a trend-level significance ( $0.05 < p < 0.10$ ) are depicted as colored panels, while relationships surpassing uncorrected  $p < 0.05$  are additionally denoted with \*, and relationships surpassing BH- $p < 0.05$  (for the total number of tests depicted in the figure) are denoted with \*\*. The ordering of each phenotype within the rows and columns of each heatmap were based on hierarchical clustering of the correlation coefficients. The extended major histocompatibility (MHC) region contains high amounts of long-range LD, making it challenging to accurately map association signals in this region. For this reason, and following the work of others,<sup>65,66</sup> we repeated our analyses after the exclusion of this region (chromosome 6, base positions  $25 \times 10^6$  to  $35 \times 10^6$ ). Estimated heritability and features of each GWAS data set after MHC removal are shown in Supplementary Table 2.

In the following sections, we primarily report genetic relationships observed under MHC inclusion, and we indicate relationships that changed (*i.e.* gain or loss of nominal significance) when MHC was excluded.

## Results

### Correlations between Brain/Behavior/Development and Immune/Inflammatory Phenotypes

We first examined relationships between the set of brain-behavior-development phenotypes and the set of immune and inflammatory phenotypes. The GWAS signals for personality domains and angry temperament did not show significant correlations with immune and inflammatory phenotypes, so they were omitted from the following set of analyses. Pair-wise genetic correlations between brain/behavioral and immune/inflammatory phenotypes are shown in Figure 1 and detailed results are provided in Supplementary Table 3. These same genetic correlations, repeated in the absence of the extended MHC region, are described in Supplementary Table 4. Unless specifically indicated, all correlations described in the main text were maintained at the same significance threshold in the absence of the MHC region. We attempt to focus our reporting on genetic relationships that have not previously been reported using this method. Notably, four correlations survived BH multiple-test correction and these relationships maintained a corrected level of significance after removal of the MHC region. Among these, were significant positive relationships between bipolar disorder and celiac disease ( $rg = 0.31 \pm 0.09$ ) and bipolar disorder and ulcerative colitis ( $rg = 0.25 \pm 0.06$ ). We also detected a significant negative correlation between birth weight and coronary artery disease ( $rg = -0.37 \pm 0.09$ ), as well as birth weight and type 2 diabetes ( $rg = -0.37 \pm 0.09$ ). In the following paragraphs, we highlight relationships that surpassed a nominal significance threshold (uncorrected  $p < 0.05$ ).

In addition to celiac disease and ulcerative colitis, bipolar disorder also showed a nominally significant correlation with Crohn's disease ( $rg = 0.14 \pm 0.06$ ). In the absence of the MHC region, a previously undetected negative relationship between bipolar and rheumatoid arthritis rose to nominal significance ( $rg = -0.15 \pm 0.07$ ). Obsessive-compulsive disorder was also positively related to celiac disease ( $rg = 0.39 \pm 0.18$ ) and ulcerative colitis ( $rg = 0.29 \pm 0.09$ ), but negatively related to type 1 diabetes ( $rg = -0.28 \pm 0.10$ ). Schizophrenia showed positive relationships with ulcerative colitis ( $rg =$



## Genetic correlations among behavioral and immune phenotypes - 9

0.12  $\pm$  0.05), Crohn's disease ( $rg = 0.09 \pm 0.04$ ), all-cause ischemic stroke ( $rg = 0.22 \pm 0.08$ ), and myeloid leukemias ( $rg = 0.35 \pm 0.13$ ). Schizophrenia showed a positive relationship with susceptibility to tuberculosis ( $rg = 0.15 \pm 0.07$ ) and with HIV viral control ( $rg = 0.17 \pm 0.08$ ), but the latter relationship was diminished to a statistical trend ( $p < 0.09$ ) upon MHC removal. Curiously, autism showed a negative correlation ( $rg = -0.43 \pm 0.21$ ) with myeloid neoplasms, but this relationship was also diminished to a trend ( $p < 0.06$ ) upon MHC removal. The GWAS signal of epilepsy with partial seizures was positively related to all-cause ischemic stroke ( $rg > 0.95 \pm 0.35$ ) and with type 2 diabetes ( $rg = 0.62 \pm 0.28$ ). The combined signal reflecting reading disability and language impairment was negatively related to type 2 diabetes ( $rg = -0.46 \pm 0.18$ ). A nominally significant positive relationship between ADHD and systolic blood pressure was detected in the absence of the MHC region ( $rg = 0.09 \pm 0.05$ ), but was diminished to a statistical trend ( $p < 0.06$ ) upon MHC inclusion.

Interestingly, there was a positive relationship between smoking (cigarettes per day; ever-smoked-status) with all-cause ischemic stroke ( $rg = 0.46 \pm 0.20$ ;  $rg = 0.53 \pm 0.16$ , respectively), susceptibility to tuberculosis infection ( $rg = 0.50 \pm 0.18$ ,  $rg = 0.31 \pm 0.13$ ), and coronary artery disease ( $rg = 0.34 \pm 0.12$ ;  $rg = 0.24 \pm 0.07$ ). Additionally, cigarettes per day was positively related to type 2 diabetes ( $rg = 0.27 \pm 0.11$ ), but negatively related to morning plasma cortisol levels ( $rg = -0.80 \pm 0.39$ ). Furthermore, ever-smoked-status was positively related to rheumatoid arthritis ( $rg = 0.14 \pm 0.05$ ) and large vessel stroke ( $rg = 0.71 \pm 0.34$ ), though the latter relationship was diminished to a statistical trend ( $p < 0.07$ ) upon removal of the MHC.

In addition to the relationships involving birth weight, several interesting relationships involving other developmental phenotypes were observed. Birth length was negatively related to type 2 diabetes ( $rg = -0.23 \pm 0.09$ ). Head circumference was negatively related to atopic dermatitis ( $rg = -0.31 \pm 0.14$ ), ulcerative colitis ( $rg = -0.24 \pm 0.10$ ), and pulse pressure ( $rg = -0.07 \pm 0.03$ ), though the latter relationship was diminished to a statistical trend upon MHC removal. Additionally, upon MHC removal, head circumference showed a significant negative relationship ( $rg = -0.39 \pm 0.19$ ) with eosinophilic

## Genetic correlations among behavioral and immune phenotypes - 10

esophagitis. Intracranial volume was positively related to Crohn's disease ( $rg = 0.29 \pm 0.11$ ) and negatively related to coronary artery disease ( $rg = -0.32 \pm 0.13$ ).

We observed a number of highly significant genetic correlations among the brain/behavior/development phenotypes; these are depicted in Figure 2, with full summary statistics in Supplementary Tables 5 (with MHC) and 6 (without MHC). Additionally, we observed several highly significant and previously unquantified genetic correlations among the immune and inflammatory phenotypes; these are depicted in Figure 3, with full summary statistics in Supplementary Table 7 (with MHC) and 8 (without MHC). Among those surviving family-wise BH correction were positive relationships between celiac and Crohn's disease ( $rg = 0.31 \pm 0.09$ ), celiac and type 1 diabetes ( $rg = 0.32 \pm 0.09$ ), Crohn's and ulcerative colitis ( $rg = 0.59 \pm 0.06$ ), and coronary artery disease and type 2 diabetes ( $rg = 0.43 \pm 0.07$ ). Notably, these relationships maintained a corrected level of significance after removal of the MHC region. Additionally, several nominally significant relationships were observed. Celiac disease showed modest positive relationships with ulcerative colitis, rheumatoid arthritis, and systemic sclerosis ( $rg = 0.30 \pm 0.11$ ,  $0.24 \pm 0.08$ , and  $0.39 \pm 0.19$ , respectively). Ulcerative colitis also showed positive relationships with rheumatoid arthritis ( $rg = 0.13 \pm 0.06$ ). Rheumatoid arthritis showed a positive relationship with systemic sclerosis ( $rg = 0.38 \pm 0.14$ ). Type 1 diabetes was positively related to autoimmune hepatitis ( $rg = 0.55 \pm 0.19$ ) and rheumatoid arthritis ( $rg = 0.30 \pm 0.15$ ). IgA nephropathy was negatively correlated with rheumatoid arthritis ( $rg = -0.47 \pm 0.17$ ), Crohn's disease ( $rg = -0.47 \pm 0.20$ ), and atopic dermatitis ( $rg = -0.66 \pm 0.30$ ). Atopic dermatitis was positively related to sarcoidosis ( $rg = 0.45 \pm 0.21$ ). Additionally, several aspects of blood pressure showed a weak positive relationship with myeloid neoplasia ( $rg \approx 0.15 \pm 0.08$ ). Susceptibility to tuberculosis was negatively related ( $rg = -0.58 \pm 0.24$ ) to the ability to control HIV infection. Upon removal of the MHC region, several previously non-significant correlations rose to nominal significance, including a negative relationship between type 1 and type 2 diabetes ( $rg = -0.25 \pm 0.09$ ) and positive relationships between rheumatoid arthritis and

autoimmune hepatitis ( $rg = 0.58 \pm 0.21$ ), Crohn's and susceptibility to tuberculosis ( $rg = 0.23 \pm 0.10$ ), and myeloid neoplasia and all-cause ischemic stroke ( $rg = 0.73 \pm 0.34$ ).

## Discussion

Quantitative SNP-based genetic relationships between disorders have been explored previously using other statistical approaches (restricted maximum likelihood [REML] co-heritability, polygenic risk scores, genetic analysis incorporating pleiotropy and annotations, and other permutation-based methods).<sup>14,67-69</sup> It is apparent that different approaches to examining genetic relationships across disorders are prone to arriving at different conclusions. For example, a recent study by Pouget and colleagues demonstrated that polygenic risk scores reflecting additive risk for several autoimmune disease can explain a small proportion of variance in schizophrenia case-control status, yet the genome-wide significant SNPs from the autoimmune GWASs were not over-represented among schizophrenia's genome-wide significant hits when permutation-based analysis was performed.<sup>69</sup> While other methods are better suited to characterizing the specific loci contributing to shared genetic risk,<sup>14,67,69,70</sup> the approach taken here attempts to quantitate similarities and differences in association signals across the entire genome. Using this approach, we identified several relationships between brain/behavioral phenotypes and immune/inflammatory phenotypes that were robust to multiple testing; we focus our discussion on those. Some of these phenotype pairs have assessed previously using the LD score regression method and we compare our results with the findings of those previous studies.<sup>65,66,71</sup>

Prominent among our findings was a positive genetic correlation between bipolar and celiac disease. To our knowledge, this relationship has not previously been quantitatively reported. Several large-scale epidemiological studies have reported that a history of autoimmune disease increases the subsequent risk for bipolar disorder (along with other psychiatric phenotypes),<sup>9,72</sup> and a history of celiac disease appears to significantly increase the subsequent risk for mood disorders (including bipolar),<sup>72</sup> though well-powered reports linking a history of celiac disease with bipolar disorder (in particular) have

not yet emerged. More comprehensive reviews of the neurological and psychiatric findings reported in association with celiac disease or gluten insensitivity can be found elsewhere,<sup>73,74</sup> along with more comprehensive reviews of immune-related findings in bipolar disorder.<sup>3,75</sup> Here, we focus on a small body of clinical literature examining celiac disease or gluten hypersensitivity in connection with bipolar disorder.<sup>76</sup> One cross-sectional study of patients ascertained for celiac disease identified a higher incidence of bipolar disorder than comparison subjects without celiac disease.<sup>77</sup> Conversely, studies of patients ascertained for bipolar disorder have examined serological markers in order to gain insight into this relationship.

Celiac disease is typically distinguished from the apparently more common condition of gluten sensitivity or gluten-related allergy based on the presence of histological damage upon intestinal biopsy and the presence of serological markers indicating an autoimmune response involving the adaptive immune system.<sup>76</sup> With respect to serological markers, anti-endomysial and anti-tissue transglutaminase antibodies tend to be considered more specific for celiac disease, while anti-deamidated gluten peptide may be assessed in certain situations (*e.g.* IgA deficiency) to support diagnosis, and anti-gliadin antibodies could be considered compatible with both celiac or gluten sensitivity without intestinal damage.<sup>76</sup> Similarly, IgA autoantibodies tend to be considered more specific, but IgG autoantibodies may also be considered, particularly in the setting of IgA deficiency.

In one study of patients ascertained for bipolar disorder, higher levels of IgG anti-gliadin and suggestive evidence of higher levels of IgG to de-amidated gliadin peptide were observed compared to comparison subjects without a psychiatric diagnosis, but no significant differences were observed in levels of IgA to either antigen or in levels of IgA or IgG to tissue transglutaminase enzyme.<sup>78</sup> The same group examined individuals hospitalized with acute mania, and reported significantly increased levels of IgG anti-gliadin compared with non-psychiatric control subjects, but did not replicate the finding of increased IgG to de-amidated gliadin peptide.<sup>79</sup> As a whole, this group of acutely hospitalized individuals showed no significant difference in IgG anti-gliadin levels compared with controls at a six-month

longitudinal follow-up. However, individuals showing persistently elevated levels of IgG anti-gliadin at follow-up were more likely to have been hospitalized during the intervening period. Another study screened a sample of 104 psychiatric inpatients and 41 non-psychiatric comparison subjects for concentrations of 14 different autoantibodies. IgG anti-gliadin was the most frequently detectable antibody in the patients, while anti-double-stranded DNA was the most frequently detected among controls. With respect to group differences in concentrations, they observed significantly higher levels of IgG anti-gliadin (but no other antibodies) among the psychiatric patients.<sup>80</sup> The sample reflected a mixture of diagnostic phenotypes, with approximately 15.5% classified as bipolar and another 22.3% classified as schizoaffective. The titers of these antibodies were reported to be within the low range, with respect to the threshold typically used to inform the diagnosis of autoimmune disease. Taken together, the clinical literature provides some support for the ideas that: 1) celiac disease incidence may be higher in bipolar-affected individuals compared with non-psychiatric comparison subjects; and 2) a subset of bipolar disorder patients demonstrate serological patterns that could be consistent with gluten hypersensitivity. The present findings of a positive genetic correlation between celiac disease and bipolar disorder suggests that similarities in the common variant genetic risk signal for these two conditions may underlie these clinical associations. The phenomena of autoantibodies in individuals with bipolar disorder has found mixed support over the past few decades.<sup>81–85</sup> A recent meta-analysis concluded that there was significantly higher odds of NMDA receptor antibody seropositivity among those with major psychiatric disorders (including schizophrenia or schizoaffective, bipolar, or major depressive disorders).<sup>86</sup> Taken together, the present study suggests an understanding of the genetic diathesis (or gene-x-environment interactions) that dispose individuals to autoantibody production in celiac disease may help shed light on the phenomenon of autoantibody production in bipolar disorder.

We also observed an apparently robust positive genetic correlation between bipolar disorder and ulcerative colitis. A previously mentioned epidemiological study found increased prevalence of mood disorders (including bipolar) among individuals with ulcerative colitis (as well as a number of other

## Genetic correlations among behavioral and immune phenotypes - 14

autoimmune phenotypes).<sup>72</sup> Additionally, another study reported a positive association between ulcerative colitis (as well as Crohn's disease) and risk for a concurrent diagnosis of bipolar disorder.<sup>87</sup> The literature regarding the genetic similarities between bipolar and ulcerative colitis appears mixed. The first study implementing the LD score regression method reported no significant correlation ( $rg = 0.08 \pm 0.08$ , uncorrected  $p = .33$ ) between these phenotypes; the present study used the same bipolar GWAS summary data, but a different version of the ulcerative colitis GWAS data, and we restricted our analysis to SNPs with a minor allele frequency  $\geq 5\%$  in the 1000 Genomes Project Phase 3 European samples. In keeping with this initial report, a similar genetic correlation is also reported in LD-Hub (<http://ldsc.broadinstitute.org/>), using what appear to be the same data sets. Thus, it seems data set selection and preprocessing can have a considerable effect on the result of the LD score regression method. On the other hand, Wang *et al.*<sup>14</sup> used several approaches that were not dependent on the directionality of a given SNP's effect, and they concluded that many (24 of 35) pairwise combinations of psychiatric and immune-related phenotypes shared a statistically significant proportion of risk-associated loci; among these findings was a significant genetic correlation between bipolar disorder (as well as schizophrenia) and ulcerative colitis. However, many of the other relationships identified by Wang and colleagues were not significant in the present study. Finally, one previous study implementing a REML-based approach did not find significant SNP-based co-heritabilities between Crohn's disease and the major psychiatric phenotypes.<sup>68</sup> Taken together, the existing literature seems to support the possibility that a genetic relationship may play a role in the increased comorbidity between bipolar and ulcerative colitis.

We observed several robustly significant genetic correlations among brain-behavioral phenotypes (particularly psychiatric phenotypes), all of which have been reported previously using related sets of summary statistics reflecting published versions of PGC Working Group primary studies (used presently),<sup>66</sup> unreleased versions of PGC Working Group results,<sup>71</sup> or previously published results from the PGC Cross Disorder GWAS study.<sup>65</sup> These included positive inter-correlations between

## Genetic correlations among behavioral and immune phenotypes - 15

schizophrenia, bipolar disorder, major depression, and obsessive compulsive disorder. Differences in estimated heritabilities, genetic correlation point estimates, and error estimates across these studies could be accounted for by utilization of different versions of the GWAS summary data, differences in pre-processing methods, or differences in the implementation of the genetic correlation with constrained model intercept based on known proportion of sample overlap; this latter feature was not performed in the present study, because only association summary-level data could be provided for our study and we did not want to risk the introduction of bias through miscalculation of sample overlap. Furthermore, we noticed that several apparently modestly powered ordinal phenotypes with high estimated heritability (*e.g.* opioid and cocaine dependence) consistently produced genetic correlations that were above or below the accepted boundaries of the LDSC software. Despite these differences, we observed many of the same robustly significant genetic correlations that were previously reported among brain-behavioral phenotypes, and these correlations maintained similar significance and correlation strength in the presence and absence of the extended MHC region.

Genetic relationships among many of the immune and inflammatory phenotypes had not been quantified previously using this method, though previous studies employing alternative methods have suggested considerable genetic pleiotropy<sup>70</sup> and genetic correlation.<sup>88</sup> We observed robust positive genetic correlations between celiac disease and type 1 diabetes. Type 1 diabetes is caused by the autoimmune destruction of insulin-secreting pancreatic beta cells. The co-segregation of type 1 diabetes and celiac disorder (or its serological markers) is a well-documented observation.<sup>89–93</sup> Notably, genetic risk for both celiac and type 1 diabetes are mediated by some of the same Class II HLA-DBQ1 alleles,<sup>91,94,95</sup> however the present study and others support the idea that these phenotypes share common variant genetic risk factors outside of the extended MHC region.<sup>92,94</sup> We also observed a robust positive genetic correlation between celiac and Crohn's disease. Celiac disease is relatively more rare, limited to the small intestines, and is thought to involve an inappropriate immune response to dietary constituents and their metabolic biproducts. In Crohn's disease, inflammation can occur throughout the

## Genetic correlations among behavioral and immune phenotypes - 16

gastrointestinal tract (though most commonly affects the ileum of the small intestines) and is thought to involve abnormal reactions to normal commensal flora of the bowel in genetically susceptible individuals. Within the clinical literature, only a few studies of small samples have explicitly examined the comorbidity between these two phenotypes, with seemingly equivocal results across studies.<sup>96–98</sup> Despite the unclear clinical picture, genetic studies have employed cross-phenotype GWAS comparison and meta-analysis to identify loci that might mediate risk for both disorders.<sup>70,99</sup>

We observed a robust positive genetic correlation between Crohn's and ulcerative colitis. While the vast majority of published studies have examined the differential diagnosis of these two conditions, there is a smaller body of literature examining their clinical comorbidity. These two phenotypes appear to co-occur within families,<sup>100,101</sup> though studies of co-occurrence within individual patients appear to be limited to case reports.<sup>102,103</sup> The heritability of Crohn's disease appears to be higher than that of ulcerative colitis, as does the family risk (for any inflammatory bowel disorder) imparted to first-degree relative.<sup>104</sup> Because these two phenotypes are often considered jointly as inflammatory bowel disease in previously published studies, little direct light has been shed on whether the extent to which a family history of one increases subsequent risk for the other. Nonetheless, the apparent similarity between the phenotypes stimulated a substantial body of genetic studies highlighting shared risk loci for these conditions.<sup>70,88,105–107</sup>

We must recognize that several of the GWAS data sets used in the present study were likely under-powered for reliable heritability estimation and genetic correlation, hence some genetic correlations between these phenotypes may have gone undetected. Our study yielded an abundance of nominally significant genetic correlations, many of which probably reflect false-positive findings, and thus the set of findings should be considered with appropriate caution. Another important critique of this exploratory examination of existing GWAS data is related to the lack of clearly identified positive and negative control comparisons; these types of comparisons would be essential in order to assess the sensitivity and specificity of the LD score regression approach to assessing genetic relationships. Studies designed to



## Genetic correlations among behavioral and immune phenotypes - 17

assess the limitations of this method may be especially warranted in light of the apparent absence of genetic correlation between phenotypes in which a significant positive correlation might be presumed (*e.g.* blood pressure and stroke, stroke and coronary artery disease). Despite these limitations, many of the nominally significant correlations are intriguing and warrant further examination; future studies may be able to utilize GWAS data derived from larger samples or more selective test hypotheses to alleviate the burden of multiple testing.

More generally, it is important to recognize that genetic correlations detected in this study could be influenced by a number of phenomena. As discussed previously,<sup>65,71</sup> a heritable, yet unexamined underlying trait might confer risk to two or more phenotypes, thereby giving rise to an apparent genetic correlation between them. Related to this concept, the present study identified nominally significant positive correlations between smoking behavior and several of the immune and inflammatory conditions thought to be caused or exacerbated by smoking. These findings suggest that GWAS signal of some immune or inflammatory diseases may actually be tainted with GWAS signal reflecting the propensity toward smoking behavior and that statistical control or *post-hoc* adjustment of results may help distinguish these two effects. We also must recognize that GWAS studies of psychiatric phenotypes typically do not screen affected cases based on general medical conditions, and studies of immune-related phenotypes may not exclude individuals with psychiatric comorbidity. Thus, if there is true co-segregation of two phenotypes in the population, it is possible that a psychiatric sample may unwittingly over-represent the cases of a given immune-related phenotype, and vice-versa, contributing to the appearance of positive genetic correlation. Alternatively, it is unclear the extent to which explicit exclusion of individuals from a control group could bias the estimated genetic correlation in certain circumstances (*e.g.* the exclusion of individuals with type 1 diabetes from the control group of a study of type 2 diabetes and vice-versa). Another caveat to consider in any cross-phenotype genetic study involving clinically similar conditions is that the estimate of genetic similarities could be influenced by a subset of misdiagnosed cases.<sup>108</sup> General limitations of this method (in comparison with other

## Genetic correlations among behavioral and immune phenotypes - 18

approaches) have been discussed previously,<sup>65,71</sup> and include the requirement for large sample sizes, the current inability to extend to samples of recently admixed ancestry, the present inability to account for the effects of other factors (*e.g.* assortative mating),<sup>109</sup> and reliance on the assumption that traits examined are sufficiently polygenic. Other methods may be better suited to examine or quantitate genetic relationships between phenotypes where common variation is known to be associated with large effect sizes.<sup>65</sup> Additionally, consideration of expression quantitative trait loci, differentially expressed or methylated genes, or enriched ontological and functional terms may provide a broader context for assessing biological similarities between phenotypes.

With the recent launch of a web-based platform for performing LD-score regression analyses (<http://ldsc.broadinstitute.org/>) and for sharing GWAS summary-level data,<sup>66</sup> investigators can perform their own analyses for phenotypes of interest with relative ease. We hope that the availability of well-powered GWAS summary data will increase as tools like these gain more widespread use. Nevertheless, we identified several phenotypes (multiple sclerosis, psoriasis, systemic lupus erythematosus, glioma, and circulating IgE and C-reactive Protein) for which well-powered GWAS summary data exist, but could not be provided for the present analysis. The broader research community should commend the monumental efforts of research teams and consortia that make possible large-scale GWAS and GWAS meta-analyses. Because of the immense amount of work required for subject ascertainment, genotyping, imputation, quality control, and association testing, there is considerable incentive to delay the release of GWAS summary data into the public domain. As such, groups electing to disseminate their summary-level data should be commended for this additional level of commitment to the goal of advancing the scientific understanding of human disease. The present study, as well as its predecessors,<sup>65,66,71</sup> and other approaches for cross-phenotype GWAS integration,<sup>70,110–112</sup> justify the impetus for open sharing of GWAS results in order to accelerate the discovery of previously undetected genetic relationships that extend across medical disciplines and to support the identification and prioritization of multi-disease-associated loci.

While there is clear and historic support for the assertion that psychiatric and neurodevelopmental disorders primarily involve alterations to tissues, circuits, and resident cells of the brain (*i.e.* neurons and glia), a growing body of literature suggests that the cells and signaling molecules of the immune system are poised to influence the early development of these entities, as well as their plasticity and function in fully developed organisms. As plausible mechanisms linking altered immune functions with neurobiological changes are identified in model systems, it will provide an increasingly clear context for understanding how altered immune and inflammatory states might be contributing to the development or symptomatic maintenance of disorder in subsets of psychiatric patients. In support of these future goals, the present study leveraged existing data and identified immune-related phenotypes that appear to share genetic diatheses with the psychiatric and neurodevelopmental phenotypes.

### Acknowledgements

The authors gratefully acknowledge the contributions all of the individuals (patients, families, clinicians and diagnosticians, research associates, and data analysts) and consortia whose efforts made possible the GWAS studies and meta-analyses featured in the present study. For most of the phenotypes examined in the present study, clinical and genetic data were collected across numerous sites, each with their own unique patients, staff, and funding sources. While we attempted to provide more thorough recognition of the required acknowledgments for each individual phenotype in our supplementary note, we realize that it is not possible to recognize every individual and funding mechanism that made these studies possible, and we apologize for this. We also gratefully acknowledge the developers of the LDSC software. The authors declare no conflicts of interest related to this study. Daniel S. Tylee, Jonathan L. Hess, and Stephen J. Glatt were supported by grants from the U.S. National Institutes of Health (R01MH101519, P50MH081755), the Gerber Foundation, the Sidney R. Baer, Jr. Foundation, NARSAD: The Brain & Behavior Research Foundation. Daniel S. Tylee was also supported by the Autism Speaks foundation (Weatherstone Pre-doctoral Training Grant #9645). Rainer Malik was supported by the Vascular Dementia Research Foundation. Andrew Levine was supported by the UCLA-AIDS Institute

and the UCLA Center for AIDS Research AI28697 (Freimer & Levine); as well as NIH R03DA026099 (Levine). We gratefully acknowledge Susan Service for her assistance preparing and analyzing the data supporting the original association studies of neurocognitive impairment and dementia in HIV-affected adults. Sergey Nejenstev is a Wellcome Trust Senior Research Fellow in Basic Biomedical Science and is also supported by the NIHR Cambridge Biomedical Research Centre.

## **Author Lists for Contributing Consortia**

### **Attention-Deficit Hyperactivity Disorder Working Group of the Psychiatric Genomics Consortium**

Stephen Faraone, Bru Cormand, Josep Antoni Ramos-Quiroga, Cristina Sánchez-Mora, Marta Ribasés, Miguel Casas, Mònica Bayés, Amaia Hervas, Maria Jesús Arranz, Yufeng Wang, Jan Haavik, Tetyana Zayats, Stefan Johansson, Carol A. Mathews, Nigel Williams, Peter Holmans, Joanna Martin, Hakon Hakonarson, Josephine Elia, Tobias J Renner, Nguyen Trang, Benno G Schimmelmann, Anke Hinney, Özgür Albayrak, Anna-Lena Volckmar, Johannes Hebebrand, André Scherag, Astrid Dempfle, Beate Herpertz-Dahlmann, Judith Sinzig, Gerd Lehmkuhl, Aribert Rothenberger, Edmund J S Sonuga-Barke, Hans-Christoph Steinhausen, Jonna Kuntsi, Philip Asherson, Robert D. Oades, Tobias Banaschewski, Ana Miranda, Fernando Mulas, Herbert Roeyers, Joseph Sergeant, Richard P. Ebstein, Tobias J. Banaschewski, Sarah Hohmann, Tobias J Renner, Helmut Schäfer, Barbara Franke, Jan K. Buitelaar, Lindsey Kent, Alejandro Arias Vasquez, Michael Gill, Nanda Lambregts-Rommelse, Richard JL Anney, Aisling Mulligan, Joseph Biederman, Stephen V. Faraone, Yanli Zhang-James, Alysa E. Doyle, Andreas Reif, Klaus-Peter Lesch, Andreas Warnke, Christine Freitag, Jasmin Romanos, Susanne Walitza, Olga Rivero, Haukur Palmason, Jobst Meyer, Marcel Romanos, Anita Thapar, Kate Langley, Michael C. O'Donovan, Michael J. Owen, Marcella Rietschel, Stephanie H Witt, Soeren Dalsgaard, Preben Bo Mortensen, Anders Børghlum, Ditte Demontis, Joel Gelernter, Irwin Waldman, Joel Nigg, Beth Wilmot, Nikolas Molly, McWeeney Shannon, Luis Rhode, Claiton Bau, Mara Hutz, Nina Roth Mota, Alexandre Todorov, Eric Mick, Sarah E. Medland, Benjamin M Neale, Raymond Walters, Mark J. Daly, Stephan Ripke, Alice Charach, Jennifer Crosbie, Russell Schachar, Abel Ickowitz, Jennifer Crosbie, Sandra K. Loo, Stan F. Nelson, Susan L. Smalley and James J. McGough

### **Autism Spectrum Disorders Working Group of the Psychiatric Genomics Consortium**

Richard Anney, Stephan Ripke, Verner Anttila, Peter Holmans, Hailiang Huang, Lambertus Klei, Phil Lee, Sarah Medland, Benjamin Neale, Elise Robinson, Lauren Weiss, Joana Almeida, David Amaral, Evdokia Anagnostou, Elena Bacchelli, Joel Bader, Anthony Bailey, Gillian Baird, Vanessa Bal, Agatino Battaglia, Arthur Beaudet, Raphael Bernier, Catalina Betancur, Nadia Bolshakova, Sven Bölte, Patrick Bolton, Thomas Bourgeron, Sean Brennan, Cátia Café, Rita Cantor, Jillian Casey, Patrícia Celestino-Soper, Andreas Chiocchetti, Ines Conceição, Judith Conroy, Catarina Correia, Michael Cuccaro, Geraldine Dawson, Maretha De Jonge, Silvia De Rubeis, Richard Delorme, Eftichia Duketis, Frederico Duque, Sean Ennis, A. Gulhan Ercan-Sencicek, M. Daniele Fallin, Bridget Fernandez, Susan Folstein, Eric Fombonne, Christine Freitag, Louise Gallagher, John Gilbert, Christopher Gillberg, Arthur

Goldberg, Jonathan Green, Andrew Green, Dorothy Grice, Stephen Guter, Jonathan Haines, Robert Hendren, Irva Hertz-Picciotto, Christina Hultman, Bozenna Iliadou, Suma Jacob, Sabine Klauck, Alexander Klevzon, Christine Ladd-Acosta, Ann Le Couteur, Marion Leboyer, David Ledbetter, Christa Lese Martin, Pat Levitt, Catherine Lord, Jennifer Lowe, Elena Maestrini, Tiago Magalhaes, Pall Magnusson, Shrikant Mane, Donna Martin, Igor Martsenkovsky, Susan McGrew, William McMahon, Alison Merikangas, Nancy Minshew, Anthony Monaco, Daniel Moreno-De-Luca, Eric Morrow, Susana Mougá, Michael Murtha, John Nurnberger, Guiomar Oliveira, Alistair Pagnamenta, Jeremy Parr, Andrew Paterson, Milica Pejovic Milovancevic, Margaret Pericak-Vance, Dalila Pinto, Joseph Piven, Christopher Poultney, Fritz Poustka, Regina Regan, Karola Rehnström, Abraham Reichenberg, Jennifer Reichert, Wendy Roberts, Kathryn Roeder, Bernadette Rogé, Guy Rouleau, Evald Saemundsen, Stephan Sanders, Sven Sandin, Gerard Schellenberg, Stephen Scherer, Teimuraz Silagadze, Latha Soorya, Matthew State, Hreinn Stefansson, Kari Stefansson, Stacy Steinberg, Oscar Svantesson, Peter Szatmari, Ann Thompson, Kathryn Tsang, Herman van Engeland, Astrid Vicente, Veronica Vieland, Jacob Vorstman, Simon Wallace, Christopher Walsh, Regina Waltes, Thomas Wassink, Ellen Wijsman, A. Jeremy Willsey, Kerstin Wittemeyer, Timothy Yu, Lonnie Zwaigenbaum, Joseph Buxbaum, Aravinda Chakravarti, Edwin Cook, Hilary Coon, Daniel Geschwind, Michael Gill, Hakon Hakonarson, Joachim Hallmayer, Aarno Palotie, Susan Santangelo, James Sutcliffe, Dan Arking, Bernie Devlin and Mark Daly

### **Bipolar Disorders Working Group of the Psychiatric Genomics Consortium**

René Breuer, Marcella Rietschel, Thomas G Schulze, Jana Strohmaier, Stephanie H Witt, Anne Farmer, Peter McGuffin, John Strauss, Wei Xu, James L Kennedy, John B Vincent, Keith Matthews, Manuel Ferreira, Roy Perlis, Colm O'Dushlaine, Shaun Purcell, Soumya Raychaudhuri, Douglas Ruderfer, Pamela Sklar, Jordan Smoller, Laura J Scott, Matthew Flickinger, Margit Burmeister, Jun Li, Weihua Guan, Devin Absher, Robert C Thompson, Fan Guo Meng, Alan F Schatzberg, William E Bunney, Jack D Barchas, Stanley J Watson, Richard M Myers, Huda Akil, Michael Boehnke, Kim Chambert, Jennifer Moran, Ed Scolnick, Ole A Andreassen, Srdjan Djurovic, Morten Mattingsdal, Ingrid Melle, Gunnar Morken, Aiden Corvin, Michael Gill, Derek Morris, Emma Quinn, Adebayo Anjorin, Nick Bass, Hugh Gurling, Radhika Kandaswamy, Jacob Lawrence, Andrew McQuillin, Douglas Blackwood, Kevin McGhee, Andrew McIntosh, Alan W McLean, Walter J Muir, Benjamin S Pickard, René Breuer, Marcella Rietschel, Thomas G Schulze, Jana Strohmaier, Stephanie H Witt, Sarah E Bergen, Kim Chambert, Jennifer Moran, Vishwajit Nimgaonkar, Shaun Purcell, Pamela Sklar, Jordan Smoller, Christina Hultman, Mikael Landén, Paul Lichtenstein, Patrick Sullivan, Martin Schalling, Urban Osby, Lena Backlund, Louise Frisén, Sarah E Bergen, Shaun Purcell, Kim Chambert, Jennifer Moran, Niklas Langstrom, Pamela Sklar, Eli Stahl, Amanda Dobbyn, Laura Huckins, Stéphane Jamain, Marion Leboyer, Bruno Etain, Frank Bellivier, Bertram Müller-Myhsok, Susanne Lucae, Markus Schwarz, Peter R Schofield, Nick Martin, Grant W Montgomery, Mark Lathrop, Sven Cichon, Thomas W Mühleisen, Franziska Degenhardt, Manuel Mattheisen, Johannes Schumacher, Wolfgang Maier, Michael Steffens, Thomas F Wienker, Peter Propping, Markus M Nöthen, Michael Bauer, Adam Wright, Philip B Mitchell, Martin Hautzinger, Andreas Reif, John R Kelsoe, Tiffany A Greenwood, Caroline M Nievergelt, Paul D Shilling, Nicholas J Schork, Erin N Smith, Cinnamon S Bloss, John I Nurnberger, Howard J Edenberg, Tatiana Foroud, Daniel L Koller, Elliot S Gershon, Chunyu Liu, Judith A Badner, William A Scheftner, William B Lawson, Evaristus A Nwulia, Maria Hipolito, William Coryell, John Rice, William Byerley,

Francis J McMahon, Thomas G Schulze, Wade Berrettini, Falk W Lohoff, James B Potash, Peter P Zandi, Pamela B Mahon, Melvin G McInnis, Sebastian Zöllner, Peng Zhang, David W Craig, Szabolcs Szelinger, Gerome Breen, David St. Clair, Sian Caesar, Katherine Gordon-Smith, Lisa Jones, Christine Fraser, Elaine K Green, Detelina Grozeva, Marian L Hamshire, Peter A Holmans, Ian R Jones, George Kirov, Valentina Moskvina, Ivan Nikolov, Michael C O'Donovan, Michael J Owen, Nick Craddock, David A Collier, Amanda Elkin, Anne Farmer, Richard Williamson, Peter McGuffin, Allan H Young, I Nicol Ferrier, George Kirov, Vihra Milanova, George Kirov, Martin Alda, Pablo Cervantes, Cristiana Cruceanu, Guy A. Rouleau, Gustavo Turecki, Qingqin Li, Sara Paciga, Simon Xi, Ashley Winslow, Maria Grigoriou-Serbanescu, Roel Ophoff, Rolf Adolfsson, Annelie Nordin Adolfsson, Jurgen Del-Favero, Carlos Pato, Joanna M Biernacka, and Mark A Frye

### **CORTisol NETwork (CORNET) Consortium**

Bolton JL, Hayward CE, Direk N, Lewis JG, Hammond GL, Hill LA, Anderson AJ, Huffman J, Wilson JF, Campbell H, Rudan I, Wright A, Hastie N, Wild SH, Velders FP, Hofman A, Uitterlinden AG, Lati J, Raikonen K, Kajantie E, Widen E, Palotie A, Eriksson JG, Kaakinen M, Jarvelin M-R, Timpson NJ, Davey-Smith G, Ring SM, Evans DM, St Pourcain B, Tanaka T, Milaneschi Y, Bandinelli S, Ferrucci L, van der Harst P, Rosmalen JGM, Bakker SJL, Verweij N, Dullaart RPF, Mahajan A, Lindgren CM, Morris A, Lind L, Ingelsson E, Anderson LN, Pennell CE, Lye SJ, Matthews SG, Eriksson J, Mellstrom D, Ohlsson C, Price JF, Strachan MWJ, Reynolds RM, Tiemeier HW, Walker BR

### **Major Depressive Disorder Working Group of the Psychiatric Genomics Consortium**

Patrick Sullivan, Stephanie Ripke, Danielle Posthuma, Henning Tiemeier, André G Uitterlinden, Nese Direk, Saira Saeed Mirza, Albert Hofman, Susanne Lucae, Stefan Kloiber, Klaus Berger, Jürgen Wellmann, Bertram Müller-Myhsok, Qingqin Li, Marcus Ising, Till Andlauer, Marcella Rietschel, Andreas Josef Forstner, Fabian Streit, Jana Strohmaier, Maren Lang, Josef Frank, Stefan Herms, Stephanie Witt, Jens Treutlein, Markus Nöthen, Sven Cichon, Franziska Degenhardt, Per Hoffmann, Thomas G. Schulze, Bernhard Baune, Udo Dannlowski, Tracy Air, Grant Sinnamon, Naomi Wray, Andrew McIntosh, Douglas Blackwood, Toni-Kim Clarke, Donald MacIntyre, David Porteous, Caroline Hayward, Tonu Esko, Evelin Mihailov, Lili Milani, Andres Metspalu, Hans J Grabe, Henry Völzke, Alexander Teumer, Sandra Van der Auwera, Georg Homuth, Matthias Nauck, Cathryn Lewis, Gerome Breen, Margarita Rivera, Michael Gill, Nick Craddock, John P Rice, Michael Owen, Peter McGuffin, Henriette Buttenschön, Ole Mors, Anders Børghlum, Jakob Grove, Jesper Krogh, Enrico Domenici, Daniel Umbricht, Jorge A Quiroz, Carsten Horn, Enda Byrne, Baptiste Couvy-Duchesne, Scott Gordon, Andrew C Heath, Anjali Henders, Ian Hickie, Pamela AF Madden, Nicholas Martin, Sarah Medland, Grant Montgomery, Dale Nyholt, Michele Pergadia, Divya Mehta, Martin Preisig, Enrique Castelao, Zoltán Kutalik, Steven Hamilton, Patrick McGrath, Katherine Tansey, Rudolf Uher, Glyn Lewis, Michael O'Donovan, Brenda WJH Penninx, Yuri Milaneschi, Wouter Peyrot, Johannes H Smit, Rick Jansen, Aartjan TF Beekman, Robert A Schoevers, Albert van Hemert, Gerard van Grootheest, Dorret Boomsma,



Jouke- Jan Hottenga, Christel Middeldorp, Eco de Geus, Abdel Abdellaoui, Gonneke Willemsen, Erin Dunn, Roy Perlis, Jordan Smoller, Patrik Magnusson, Nancy Pedersen, Alexander Viktorin, Erik Pettersson, Thomas Werge, Thomas Folkmann Hansen, Sara Paciga, Hualin Xi, Ashley Winslow, Douglas Levinson, Myrna Weissman, James Potash, Jianxin Shi, and James Knowles

# **METASTROKE consortium of the International Stroke Genetics Consortium.**

Rainer Malik, Matthew Traylor, Sara Pulit, Steve Bevan, Jemma Hopewell, Elizabeth Holliday, Wei Zhao, Patricia Abrantes, Philippe Amouyel, John Attia, Thomas Battey, Klaus Berger, Giorgio Boncoraglio, Ganesh Chauhan, Yu-Ching Cheng, Wei-Min Chen, Robert Clarke, Ioana Cotlarciuc, Stephanie Dobbie, Guido Falcone, Jose Ferro, Dale Gamble, Andreea Ilinca, Steven Kittner, Christina Kourkoulis, Robin Lemmens, Christopher Levi, Peter Lichtner, Arne Lindgren, James Meschia, Braxton Mitchell, Sofia Oliveira, Joana Pera, Alex Reiner, Peter Rothwell, Pankaj Sharma, Agnieszka Slowik, Cathie Sudlow, Turgut Tatlisumak, Vincent Thijs, Astrid Vicente, Daniel Woo, Sudha Seshadri, Danish Saleheen, Jonathan Rosand, Hugh Markus, Bradford Worrall, and Martin Dichgans.

# **Obsessive Compulsive Disorder and Tourette Syndrome Working Group of the Psychiatric**

## **Genomics Consortium**

John Alexander, Paul Arnold, Harald Aschauer, Gil Atzmon, Cristina Barlassina, Cathy Barr, Csaba Barta, Robert Batterson, Laura Bellodi, Fortu Benarroch, Chester Berlin, Gabriel Berrio, O. Bienvenu, Donald Black, Michael Bloch, Rianne Blom, Julia Bohnenpoll, Helena Brentani, Lawrence W. Brown, Ruth Bruun, Randy Buckner, Cathy Budman, Christie Burton, Beatriz Camarena, Desmond Campbell, Carolina Cappi, Julio Cardona Silgado, Danielle Cath, Maria Cavallini, Keun-Ah Cheon, Sylvain Chouinard, Barbara J. Coffey, David Conti, Edwin Cook, Giovanni Coppola, Vladimir Coric, Nancy Cox, Bernadette Cullen, Daniele Cusi, Sabrina Darrow, Lea Davis, Dieter Deforce, Richard Delorme, Damiaan Denys, Christel Depienne, Eske Derks, Andrea Dietrich, Yves Dion, Valsamma Eapen, Christopher Edlund, Karin Egberts, Lonneke Elzerman, Lauren Erdman, Patrick Evans, Peter Falkai, Thomas V. Fernandez, Martijn Figee, Nelson Freimer, Odette Fründt, Abby Fyer, Blanca Garcia-Delgar, Helena Garrido, Daniel Geller, Gloria Gerber, Donald L. Gilbert, Hans Grabe, Marco Grados, Erica Greenberg, Benjamin Greenberg, Dorothy E. Grice, Varda Gross-Tsur, Edna Grünblatt, Julie Hagstrøm, Gregory Hanna, Andreas Hartmann, Johannes Hebebrand, Tammy Hedderly, Gary A. Heiman, Sian Hemmings, Luis Herrera, Peter Heutink, Isobel Heyman, Matthew Hirschtritt, Pieter J. Hoekstra, Hyun Ju Hong, Ana Hounie, Alden Huang, Chaim Huyser, Laura Ibanez-Gomez, Cornelia Illmann, Joseph Jankovic, Michael Jenike, Clare Keenan, James Kennedy, Judith Kidd, Kenneth Kidd, Young Key Kim, Young-Shin Kim, Robert A. King, James Knowles, Yun-Joo Koh, Anuar Konkashbaev, Anastasios Konstantinidis, Sodahm Kook, Samuel Kuperman, Roger Kurlan, Nuria Lanzagorta, Marion Leboyer, James Leckman, Phil Lee, Leonhard Lennertz, Bennett L. Leventhal, Bingbin Li, Christine Lochner, Thomas Lowe, Andrea G. Ludolph, Claudia Lühns da Silva, Sara Lupoli, Gholson Lyon, Fabio Macciardi, Marcos Madrugá-Garrido, Brion Maher, Wolfgang Maier, Irene Malaty, Paolo Manunta, Athanasios Maras, Maurizio Marconi, Carol A. Mathews, Manuel Mattheisen, James McCracken, Lauren McGrath, William McMahon, Sandra Mesa Restrepo, Euripedes Miguel, Pablo Mir, Rainald Moessner, Astrid Morer, Kirsten Müller-Vahl, Alexander Münchau, Tara L. Murphy, Dennis Murphy, Allan Naarden, Peter Nagy,

Benjamin Neale, Gerald Nestadt, Humberto Nicolini, Markus Nothen, Erika Nurmi, William Ochoa, Michael Okun, Lisa Osiecki, Andrew Pakstis, Peristera Paschou, Michele Pato, Carlos Pato, David Pauls, John Piacentini, Christopher Pittenger, Kerstin J. Plessen, Yehuda Pollak, Danielle Posthuma, Vasily Ramensky, Eliana Ramos, Scott Rauch, Tobias Renner, Victor Reus, Margaret Richter, Mark Riddle, Renata Rizzo, Mary Robertson, Veit Roessner, Josh Roffman, Maria Rosário, David Rosenberg, Guy Rouleau, Stephan Ruhrmann, Andres Ruiz-Linares, Erika Salvi, Aline Sampaio, Jack Samuels, Paul Sandor, Jeremiah Scharf, Monika Schlögelhofer, Eun-Young Shin, Yin Shugart, Harvey Singer, Jan Smit, Jordan Smoller, Dong-Ho Song, Jungeun Song, Mara Stamenkovic, Matthew W. State, Dan J. Stein, S Stewart, Manfred Stuhmann, Jae-Hoon Sul, Urszula Szymanska, Zsanett Tarnok, Jay A. Tischfield, Fotis Tsetsos, Jennifer Tübing, Maurizio Turiel, Ana Valencia Duarte, Homero Vallada, Filip Van Nieuwerburgh, Jeremy Veenstra-VanderWeele, Frank Visscher, Nienke Vulink, Michael Wagner, Susanne Walitza, John Walkup, Sina Wanderer, Ying Wang, Sarah Weatherall, Jens Wendland, Tomasz Wolanczyk, Aaron Wolf, Martin Woods, Yulia Worbe, Dongmei Yu, Ivette Zelaya, and Samuel H. Zinner.

### **Schizophrenia Working Group of the Psychiatric Genomics Consortium**

Rolf Adolfsson, Ingrid Agartz, Esben Agerbo, Margot Albus, Madeline Alexander, Farooq Amin, Ole Andreassen, Silviu Bacanu, Martin Begemann, Richard Belliveau, Judit Bene, Sarah Bergen, Elizabeth Bevilacqua, Tim Bigdeli, Donald Black, Douglas Blackwood, Anders Børghlum, Elvira Bramon, Richard Bruggeman, Nancy Buccola, Randy Buckner, Brendan Bulik-Sullivan, Joseph Buxbaum, William Byerley, Wiepke Cahn, Guiqing Cai, Murray Cairns, Dominique Campion, Rita Cantor, Vaughan Carr, Noa Carrera, Stanley Catts, Kimberley Chambert, Raymond Chan, Eric Chen, Ronald Chen, Wei Cheng, Eric Cheung, Siow Chong, Sven Cichon, Robert Cloninger, David Cohen, Nadine Cohen, David Collier, Paul Cormican, Aiden Corvin, Nick Craddock, Benedicto Crespo-Facorro, James Crowley, David Curtis, Mark Daly, Ariel Darvasi, Michael Davidson, Kenneth Davis, Franziska Degenhardt, Jurgen Del Favero, Lynn DeLisi, Ditte Demontis, Dimitris Dikeos, Timothy Dinan, Srdjan Djurovic, Enrico Domenici, Gary Donohoe, Elodie Drapeau, Jubao Duan, Frank Dudbridge, Hannelore Ehrenreich, Peter Eichhammer, Johan Eriksson, Valentina Escott-Price, Tõnu Esko, Laurent Essioux, Ayman Fanous, Kai-How Farh, Martialis Farrell, Josef Frank, Lude Franke, Robert Freedman, Nelson Freimer, Joseph Friedman, Menachem Fromer, Pablo Gejman, Giulio Genovese, Lyudmila Georgieva, Elliot Gershon, Ina Giegling, Michael Gill, Paola Giusti-Rodríguez, Stephanie Godard, Jacqueline Goldstein, Srihari Gopal, Jacob Gratten, Hugh Gurling, Lieuwe Haan, Christian Hammer, Marian Hamshere, Mark Hansen, Thomas Hansen, Vahram Haroutunian, Annette Hartmann, Frans Henskens, Stefan Herms, Joel Hirschhorn, Per Hoffmann, Andrea Hofman, Mads Hollegaard, Peter Holmans, David Hougaard, Hailiang Huang, Christina Hultman, Masashi Ikeda, Nakao Iwata, Assen Jablensky, Inge Joa, Erik Jönsson, Antonio Julià, Anna Kähler, René Kahn, Luba Kalaydjieva, Sena Karachanak-Yankova, Juha Karjalainen, David Kavanagh, Matthew Keller, Brian Kelly, Kenneth Kendler, James Kennedy, Andrey Khrunin, Yunjung Kim, George Kirov, Janis Klovins, Jo Knight, James Knowles, Bettina Konte, Vaidutis Kucinskas, Zita Kucinskiene, Hana Kuzelova-Ptackova, Claudine Laurent, Phil Lee, Hong Lee, Jimmy Lee Chee Keong, Sophie Legge, Todd Lencz, Bernard Lerer, Douglas Levinson, Miaoxin Li, Tao Li, Qingqin Li, Kung-Yee Liang, Jeffrey Lieberman, Svetlana Limborska, Jianjun Liu, Jouko Lönnqvist, Carmel Loughland, Jan Lubinski, Milan Macek, Patrik Magnusson, Brion Maher, Wolfgang Maier, Anil



Malhotra, Jacques Mallet, Sara Marsal, Manuel Mattheisen, Morten Mattingsdal, Robert McCarley, Steven McCarroll, Colm McDonald, Andrew McIntosh, Andrew McQuillin, Sandra Meier, Carin Meijer, Bela Melegh, Ingrid Melle, Raquelle Mesholam-Gately, Andres Metspalu, Patricia Michie, Lili Milani, Vihra Milanova, Younes Mokrab, Jennifer Moran, Derek Morris, Ole Mors, Preben Mortensen, Bryan Mowry, Bertram Müller-Myhsok, Kieran Murphy, Robin Murray, Inez Myin-Germeys, Benjamin Neale, Mari Nelis, Igor Nenadic, Deborah Nertney, Gerald Nestadt, Kristin Nicodemus, Liene Nikitina-Zake, Laura Nisenbaum, Annelie Nordin, Markus Nöthen, Eadbhard O'Callaghan, Michael O'Donovan, Colm O'Dushlaine, F O'Neill, Sang-Yun Oh, Ann Olincy, Line Olsen, Roel Ophoff, Jim Os, Michael Owen, Sara Paciga, Aarno Palotie, Christos Pantelis, George Papadimitriou, Sergi Papiol, Elena Parkhomenko, Michele Pato, Carlos Pato, Tiina Paunio, Psychosis Endophenotypes International Consortium, Diana Perkins, Tune Pers, Tracey Petryshen, Olli Pietiläinen, Jonathan Pimm, Andrew Pocklington, Danielle Posthuma, John Powell, Alkes Price, Ann Pulver, Shaun Purcell, Digby Quested, Henrik Rasmussen, Abraham Reichenberg, Mark Reimers, Alexander Richards, Marcella Rietschel, Brien Riley, Stephan Ripke, Joshua Roffman, Panos Roussos, Douglas Ruderfer, Dan Rujescu, Veikko Salomaa, Alan Sanders, Ulrich Schall, Thomas Schulze, Sibylle Schwab, Edward Scolnick, Rodney Scott, Larry Seidman, Pak Sham, Jianxin Shi, Jeremy Silverman, Kang Sim, Pamela Sklar, Petr Slominsky, Jordan Smoller, Hon-Cheong So, Erik Söderman, Chris Spencer, David Clair, Eli Stahl, Elisabeth Stogmann, Richard Straub, Eric Strengman, Jana Strohmaier, Scott Stroup, Mythily Subramaniam, Patrick Sullivan, Jaana Suvisaari, Dragan Svrakic, Jin Szatkiewicz, Srinivas Thirumalai, Draga Toncheva, Paul Tooney, Sarah Tosato, Peter Visscher, John Waddington, Dermot Walsh, James Walters, Dai Wang, Qiang Wang, Bradley Webb, Daniel Weinberger, Mark Weiser, Thomas Werge, Dieter Wildenauer, Nigel Williams, Stephanie Williams, Stephanie Witt, Aaron Wolen, Emily Wong, Brandon Wormley, Naomi Wray, Wellcome Trust Case-Control Consortium 2, Jing Wu, Hualin Xi, Clement Zai, Xuebin Zheng, and Fritz Zimp

## References

1. Gibney SM, Drexhage HA. Evidence for a dysregulated immune system in the etiology of psychiatric disorders. *J Neuroimmune Pharmacol.* 2013;8(4):900-920. doi:10.1007/s11481-013-9462-8.
2. Jones KA, Thomsen C. The role of the innate immune system in psychiatric disorders. *Mol Cell Neurosci.* 2013;53:52-62. doi:10.1016/j.mcn.2012.10.002.
3. Rege S, Hodgkinson SJ. Immune dysregulation and autoimmunity in bipolar disorder: Synthesis of the evidence and its clinical application. *Aust N Z J Psychiatry.* 2013;47(12):1136-1151. doi:10.1177/0004867413499077.
4. Gesundheit B, Rosenzweig JP, Naor D, et al. Immunological and autoimmune considerations of Autism Spectrum Disorders. *J Autoimmun.* 2013;44:1-7. doi:10.1016/j.jaut.2013.05.005.
5. Fineberg AM, Ellman LM. Inflammatory cytokines and neurological and neurocognitive alterations in the course of schizophrenia. *Biol Psychiatry.* 2013;73(10):951-966. doi:10.1016/j.biopsych.2013.01.001.
6. Masi A, Quintana DS, Glozier N, Lloyd AR, Hickie IB, Guastella AJ. Cytokine aberrations in autism spectrum disorder: a systematic review and meta-analysis. *Mol Psychiatry.* 2015;20(4):440-446. doi:10.1038/mp.2014.59.
7. Dowlati Y, Herrmann N, Swardfager W, et al. A meta-analysis of cytokines in major depression. *Biol Psychiatry.* 2010;67(5):446-457. doi:10.1016/j.biopsych.2009.09.033.
8. Modabbernia A, Taslimi S, Brietzke E, Ashrafi M. Cytokine alterations in bipolar disorder: a meta-analysis of 30 studies. *Biol Psychiatry.* 2013;74(1):15-25. doi:10.1016/j.biopsych.2013.01.007.

# Genetic correlations among behavioral and immune phenotypes - 27

9. Eaton WW, Byrne M, Ewald H, et al. Association of schizophrenia and autoimmune diseases: linkage of Danish national registers. *Am J Psychiatry*. 2006;163(3):521-528.  
doi:10.1176/appi.ajp.163.3.521.
10. Shatz CJ. MHC class I: an unexpected role in neuronal plasticity. *Neuron*. 2009;64(1):40-45.  
doi:10.1016/j.neuron.2009.09.044.
11. Sekar A, Bialas AR, de Rivera H, et al. Schizophrenia risk from complex variation of complement component 4. *Nature*. 2016;advance on. doi:10.1038/nature16549.
12. Deverman BE, Patterson PH. Cytokines and CNS development. *Neuron*. 2009;64(1):61-78.  
doi:10.1016/j.neuron.2009.09.002.
13. Jung J-Y, Kohane IS, Wall DP. Identification of autoimmune gene signatures in autism. *Transl Psychiatry*. 2011;1:e63. doi:10.1038/tp.2011.62.
14. Wang Q, Yang C, Gelernter J, Zhao H. Pervasive pleiotropy between psychiatric disorders and immune disorders revealed by integrative analysis of multiple GWAS. *Hum Genet*. 2015;134(11-12):1195-1209. doi:10.1007/s00439-015-1596-8.
15. The Network and Pathway Analysis Subgroup of the Psychiatric Genomics Consortium. Psychiatric genome-wide association study analyses implicate neuronal, immune and histone pathways. *Nat Neurosci*. 2015;18(2):199-209. doi:10.1038/nn.3922.
16. Stringer S, Kahn RS, de Witte LD, Ophoff RA, Derks EM. Genetic liability for schizophrenia predicts risk of immune disorders. *Schizophr Res*. 2014;159(2-3):347-352.  
doi:10.1016/j.schres.2014.09.004.
17. Ripke S, Neale BM, Corvin A, et al. Biological insights from 108 schizophrenia-associated genetic loci. *Nature*. 2014;511(7510):421-427. doi:10.1038/nature13595.

18. Edwards AC, Aliev F, Wolen AR, et al. Genomic influences on alcohol problems in a population-based sample of young adults. *Addiction*. 2015;110(3):461-470. doi:10.1111/add.12822.
19. Lambert JC, Ibrahim-Verbaas CA, Harold D, et al. Meta-analysis of 74,046 individuals identifies 11 new susceptibility loci for Alzheimer's disease. *Nat Genet*. 2013;45(12):1452-1458. doi:10.1038/ng.2802.
20. Mick E, McGough J, Deutsch CK, Frazier JA, Kennedy D, Goldberg RJ. Genome-wide association study of proneness to anger. *PLoS One*. 2014;9(1):e87257. doi:10.1371/journal.pone.0087257.
21. Otowa T, Hek K, Lee M, et al. Meta-analysis of genome-wide association studies of anxiety disorders. *Mol Psychiatry*. January 2016. doi:10.1038/mp.2015.197.
22. Neale BM, Medland SE, Ripke S, et al. Meta-analysis of genome-wide association studies of attention-deficit/hyperactivity disorder. *J Am Acad Child Adolesc Psychiatry*. 2010;49(9):884-897. doi:10.1016/j.jaac.2010.06.008.
23. Lubke GH, Laurin C, Amin N, et al. Genome-wide analyses of borderline personality features. *Mol Psychiatry*. 2014;19(8):923-929. doi:10.1038/mp.2013.109.
24. Large-scale genome-wide association analysis of bipolar disorder identifies a new susceptibility locus near ODZ4. *Nat Genet*. 2011;43(10):977-983. doi:10.1038/ng.943.
25. Kasperaviciūte D, Catarino CB, Heinzen EL, et al. Common genetic variation and susceptibility to partial epilepsies: a genome-wide association study. *Brain*. 2010;133(Pt 7):2136-2147. doi:10.1093/brain/awq130.
26. Taal HR, St Pourcain B, Thiering E, et al. Common variants at 12q15 and 12q24 are associated with infant head circumference. *Nat Genet*. 2012;44(5):532-538. doi:10.1038/ng.2238.

27. Ikram MA, Fornage M, Smith A V, et al. Common variants at 6q22 and 17q21 are associated with intracranial volume. *Nat Genet.* 2012;44(5):539-544. doi:10.1038/ng.2245.
28. Eicher JD, Powers NR, Miller LL, et al. Genome-wide association study of shared components of reading disability and language impairment. *Genes Brain Behav.* 2013;12(8):792-801. doi:10.1111/gbb.12085.
29. Jernigan TL, Brown TT, Hagler DJ, et al. The Pediatric Imaging, Neurocognition, and Genetics (PING) Data Repository. *Neuroimage.* 2016;124(Pt B):1149-1154. doi:10.1016/j.neuroimage.2015.04.057.
30. Ripke S, Wray NR, Lewis CM, et al. A mega-analysis of genome-wide association studies for major depressive disorder. *Mol Psychiatry.* 2013;18(4):497-511. doi:10.1038/mp.2012.21.
31. de Moor MHM, Costa PT, Terracciano A, et al. Meta-analysis of genome-wide association studies for personality. *Mol Psychiatry.* 2012;17(3):337-349. doi:10.1038/mp.2010.128.
32. Genome-wide meta-analyses identify multiple loci associated with smoking behavior. *Nat Genet.* 2010;42(5):441-447. doi:10.1038/ng.571.
33. Gelernter J, Kranzler HR, Sherva R, et al. Genome-wide association study of alcohol dependence: significant findings in African- and European-Americans including novel risk loci. *Mol Psychiatry.* 2014;19(1):41-49. doi:10.1038/mp.2013.145.
34. Gelernter J, Kranzler HR, Sherva R, et al. Genome-wide association study of opioid dependence: multiple associations mapped to calcium and potassium pathways. *Biol Psychiatry.* 2014;76(1):66-74. doi:10.1016/j.biopsych.2013.08.034.
35. Gelernter J, Sherva R, Koesterer R, et al. Genome-wide association study of cocaine dependence and related traits: FAM53B identified as a risk gene. *Mol Psychiatry.* 2014;19(6):717-723.

Genetic correlations among behavioral and immune phenotypes - 30

doi:10.1038/mp.2013.99.

36. Horikoshi M, Yaghootkar H, Mook-Kanamori DO, et al. New loci associated with birth weight identify genetic links between intrauterine growth and adult height and metabolism. *Nat Genet.* 2013;45(1):76-82. doi:10.1038/ng.2477.
37. van der Valk RJP, Kreiner-Møller E, Kooijman MN, et al. A novel common variant in DCST2 is associated with length in early life and height in adulthood. *Hum Mol Genet.* 2015;24(4):1155-1168. doi:10.1093/hmg/ddu510.
38. EARly Genetics and Lifecourse Epidemiology (EAGLE) Eczema Consortium, Australian Asthma Genetics Consortium(AAGC), Australian Asthma Genetics Consortium AAGC. Multi-ancestry genome-wide association study of 21,000 cases and 95,000 controls identifies new risk loci for atopic dermatitis. *Nat Genet.* 2015;47(12):1449-1456. doi:10.1038/ng.3424.
39. De Boer YS, Van Gerven NMF, Zwiers A, et al. Genome-wide association study identifies variants associated with autoimmune hepatitis type 1. *Gastroenterology.* 2014;147(2). doi:10.1053/j.gastro.2014.04.022.
40. Ehret GB, Munroe PB, Rice KM, et al. Genetic variants in novel pathways influence blood pressure and cardiovascular disease risk. *Nature.* 2011;478(7367):103-109. doi:10.1038/nature10405.
41. Wain L V, Verwoert GC, O'Reilly PF, et al. Genome-wide association study identifies six new loci influencing pulse pressure and mean arterial pressure. *Nat Genet.* 2011;43(10):1005-1011. doi:10.1038/ng.922.
42. Dubois PCA, Trynka G, Franke L, et al. Multiple common variants for celiac disease influencing immune gene expression. *Nat Genet.* 2010;42(4):295-302. doi:10.1038/ng.543.

# Genetic correlations among behavioral and immune phenotypes - 31

43. Schunkert H, König IR, Kathiresan S, et al. Large-scale association analysis identifies 13 new susceptibility loci for coronary artery disease. *Nat Genet.* 2011;43(4):333-338.  
doi:10.1038/ng.784.
44. Franke A, McGovern DPB, Barrett JC, et al. Genome-wide meta-analysis increases to 71 the number of confirmed Crohn's disease susceptibility loci. *Nat Genet.* 2010;42(12):1118-1125.  
doi:10.1038/ng.717.
45. Bradfield JP, Qu HQ, Wang K, et al. A genome-wide meta-analysis of six type 1 diabetes cohorts identifies multiple associated loci. *PLoS Genet.* 2011;7(9). doi:10.1371/journal.pgen.1002293.
46. Morris AP, Voight BF, Teslovich TM, et al. Large-scale association analysis provides insights into the genetic architecture and pathophysiology of type 2 diabetes. *Nat Genet.* 2012;44(9):981-990.  
doi:10.1038/ng.2383.
47. Sleiman PMA, Wang M-L, Cianferoni A, et al. GWAS identifies four novel eosinophilic esophagitis loci. *Nat Commun.* 2014;5:5593. doi:10.1038/ncomms6593.
48. Bolton JL, Hayward C, Direk N, et al. Genome wide association identifies common variants at the SERPINA6/SERPINA1 locus influencing plasma cortisol and corticosteroid binding globulin. *PLoS Genet.* 2014;10(7):e1004474. doi:10.1371/journal.pgen.1004474.
49. Xie G, Roshandel D, Sherva R, et al. Association of granulomatosis with polyangiitis (Wegener's) with HLA-DPB1\*04 and SEMA6A gene variants: Evidence from genome-wide analysis. *Arthritis Rheum.* 2013;65(9):2457-2468. doi:10.1002/art.38036.
50. The International HIV Controllers Study. The Major Genetic Determinants of HIV-1 Control Affect HLA Class I Peptide Presentation. *Science (80- ).* 2010;330(6010):1551-1557.  
doi:10.1126/science.1195271.

# Genetic correlations among behavioral and immune phenotypes - 32

51. Levine AJ, Service S, Miller EN, et al. Genome-wide association study of neurocognitive impairment and dementia in HIV-infected adults. *Am J Med Genet B Neuropsychiatr Genet*. 2012;159B(6):669-683. doi:10.1002/ajmg.b.32071.
52. Kiryluk K, Li Y, Scolari F, et al. Discovery of new risk loci for IgA nephropathy implicates genes involved in immunity against intestinal pathogens. *Nat Genet*. 2014;46(11):1187-1196. doi:10.1038/ng.3118.
53. Tapper W, Jones A V., Kralovics R, et al. Genetic variation at MECOM, TERT, JAK2 and HBS1L-MYB predisposes to myeloproliferative neoplasms. *Nat Commun*. 2015;6:6691. doi:10.1038/ncomms7691.
54. Rye MS, Warrington NM, Scaman ESH, et al. Genome-wide association study to identify the genetic determinants of otitis media susceptibility in childhood. *PLoS One*. 2012;7(10):e48215. doi:10.1371/journal.pone.0048215.
55. Ellinghaus E, Stuart PE, Ellinghaus D, et al. Genome-Wide Meta-Analysis of Psoriatic Arthritis Identifies Susceptibility Locus at REL. *J Invest Dermatol*. 2012;132(4):1133-1140. doi:10.1038/jid.2011.415.
56. Okada Y, Wu D, Trynka G, et al. Genetics of rheumatoid arthritis contributes to biology and drug discovery. *Nature*. 2014;506(7488):376-381. doi:10.1038/nature12873.
57. Hofmann S, Fischer A, Nothnagel M, et al. Genome-wide association analysis reveals 12q13.3-q14.1 as new risk locus for sarcoidosis. *Eur Respir J*. 2013;41(4):888-900. doi:10.1183/09031936.00033812.
58. Radstake TRDJ, Gorlova O, Rueda B, et al. Genome-wide association study of systemic sclerosis identifies CD247 as a new susceptibility locus. *Nat Genet*. 2010;42(5):426-429. doi:10.1038/ng.565.



59. Traylor M, Farrall M, Holliday EG, et al. Genetic risk factors for ischaemic stroke and its subtypes (the METASTROKE Collaboration): A meta-analysis of genome-wide association studies. *Lancet Neurol.* 2012;11(11):951-962. doi:10.1016/S1474-4422(12)70234-X.
60. Malik R, Traylor M, Pulit SL, et al. Low-frequency and common genetic variation in ischemic stroke: The METASTROKE collaboration. *Neurology.* 2016;86(13):1217-1226. doi:10.1212/WNL.0000000000002528.
61. Hom G, Graham RR, Modrek B, et al. Association of systemic lupus erythematosus with C8orf13-BLK and ITGAM-ITGAX. *N Engl J Med.* 2008;358(9):900-909. doi:10.1056/NEJMoa0707865.
62. Curtis J, Luo Y, Zenner HL, et al. Susceptibility to tuberculosis is associated with variants in the ASAP1 gene encoding a regulator of dendritic cell migration. *Nat Genet.* 2015;47(5):523-527. doi:10.1038/ng.3248.
63. Anderson CA, Boucher G, Lees CW, et al. Meta-analysis identifies 29 additional ulcerative colitis risk loci, increasing the number of confirmed associations to 47. *Nat Genet.* 2011;43(3):246-252. doi:10.1038/ng.764.
64. Bulik-Sullivan BK, Loh P-R, Finucane HK, et al. LD Score regression distinguishes confounding from polygenicity in genome-wide association studies. *Nat Genet.* 2015;47(3):291-295. doi:10.1038/ng.3211.
65. Bulik-Sullivan B, Finucane HK, Anttila V, et al. An atlas of genetic correlations across human diseases and traits. *Nat Genet.* 2015;47(11):1236-1241. doi:10.1038/ng.3406.
66. ZHENG J, Erzurumluoglu M, Elsworth B, et al. *LD Hub: A Centralized Database and Web Interface to Perform LD Score Regression That Maximizes the Potential of Summary Level GWAS Data for SNP Heritability and Genetic Correlation Analysis.* Cold Spring Harbor Labs Journals; 2016. doi:10.1101/051094.

67. Identification of risk loci with shared effects on five major psychiatric disorders: a genome-wide analysis. *Lancet*. 2013;381(9875):1371-1379. doi:10.1016/S0140-6736(12)62129-1.
68. Lee SH, Ripke S, Neale BM, et al. Genetic relationship between five psychiatric disorders estimated from genome-wide SNPs. *Nat Genet*. 2013;45(9):984-994. doi:10.1038/ng.2711.
69. Pouget JG, Han B, Mignot E, et al. *Polygenic Analysis of Schizophrenia and 19 Immune Diseases Reveals Modest Pleiotropy*. Cold Spring Harbor Labs Journals; 2016. doi:10.1101/068684.
70. Cotsapas C, Voight BF, Rossin E, et al. Pervasive sharing of genetic effects in autoimmune disease. *PLoS Genet*. 2011;7(8):e1002254. doi:10.1371/journal.pgen.1002254.
71. Anttila V et al. Analysis of shared heritability in common disorders of the brain. *Submitted*. 2015.
72. Benros ME, Waltoft BL, Nordentoft M, et al. Autoimmune diseases and severe infections as risk factors for mood disorders: a nationwide study. *JAMA psychiatry*. 2013;70(8):812-820. doi:10.1001/jamapsychiatry.2013.1111.
73. Jackson JR, Eaton WW, Cascella NG, Fasano A, Kelly DL. Neurologic and psychiatric manifestations of celiac disease and gluten sensitivity. *Psychiatr Q*. 2012;83(1):91-102. doi:10.1007/s11126-011-9186-y.
74. Bushara KO. Neurologic presentation of celiac disease. *Gastroenterology*. 2005;128(4 Suppl 1):S92-S97. <http://www.ncbi.nlm.nih.gov/pubmed/15825133>. Accessed May 12, 2016.
75. Barbosa IG, Machado-Vieira R, Soares JC, Teixeira AL. The immunology of bipolar disorder. *Neuroimmunomodulation*. 2014;21(2-3):117-122. doi:10.1159/000356539.
76. Porcelli B, Verdino V, Bossini L, Terzuoli L, Fagiolini A. Celiac and non-celiac gluten sensitivity: a review on the association with schizophrenia and mood disorders. *Autoimmun Highlights*. 2014;5(2):55-61. doi:10.1007/s13317-014-0064-0.

77. Carta MG, Conti A, Lecca F, et al. The burden of depressive and bipolar disorders in celiac disease. *Clin Pract Epidemiol Ment Heal*. 2015;11:180-185.  
<http://www.scopus.com/inward/record.url?eid=2-s2.0-84954225153&partnerID=tZOtx3y1>.
78. Dickerson F, Stallings C, Origoni A, et al. Markers of gluten sensitivity and celiac disease in bipolar disorder. *Bipolar Disord*. 2011;13(1):52-58. doi:10.1111/j.1399-5618.2011.00894.x.
79. Dickerson F, Stallings C, Origoni A, Vaughan C, Khushalani S, Yolken R. Markers of gluten sensitivity in acute mania: a longitudinal study. *Psychiatry Res*. 2012;196(1):68-71.  
doi:10.1016/j.psychres.2011.11.007.
80. Sidhom O, Laadhar L, Zitouni M, et al. Spectrum of autoantibodies in Tunisian psychiatric inpatients. *Immunol Invest*. 2012;41(5):538-549. doi:10.3109/08820139.2012.685537.
81. Hornig M, Amsterdam JD, Kamoun M, Goodman DB. Autoantibody disturbances in affective disorders: a function of age and gender? *J Affect Disord*. 1999;55(1):29-37. doi:10.1016/S0165-0327(98)00190-6.
82. Rapaport MH. Immune parameters in euthymic bipolar patients and normal volunteers. *J Affect Disord*. 1994;32(3):149-156. doi:10.1016/0165-0327(94)90012-4.
83. Vonk R, van der Schot AC, Kahn RS, Nolen WA, Drexhage HA. Is autoimmune thyroiditis part of the genetic vulnerability (or an endophenotype) for bipolar disorder? *Biol Psychiatry*. 2007;62(2):135-140. doi:10.1016/j.biopsych.2006.08.041.
84. Padmos RC, Bekris L, Knijff EM, et al. A high prevalence of organ-specific autoimmunity in patients with bipolar disorder. *Biol Psychiatry*. 2004;56(7):476-482.  
doi:10.1016/j.biopsych.2004.07.003.
85. Dickerson F, Stallings C, Vaughan C, Origoni A, Khushalani S, Yolken R. Antibodies to the

# Genetic correlations among behavioral and immune phenotypes - 36

- glutamate receptor in mania. *Bipolar Disord.* 2012;14(5):547-553. doi:10.1111/j.1399-5618.2012.01028.x.
86. Pearlman DM, Najjar S. Meta-analysis of the association between N-methyl-d-aspartate receptor antibodies and schizophrenia, schizoaffective disorder, bipolar disorder, and major depressive disorder. *Schizophr Res.* 2014;157(1-3):249-258. doi:10.1016/j.schres.2014.05.001.
87. Eaton WW, Pedersen MG, Nielsen PR, Mortensen PB. Autoimmune diseases, bipolar disorder, and non-affective psychosis. *Bipolar Disord.* 2010;12(6):638-646. doi:10.1111/j.1399-5618.2010.00853.x.
88. Li YR, Zhao SD, Li J, et al. Genetic sharing and heritability of paediatric age of onset autoimmune diseases. *Nat Commun.* 2015;6:8442. doi:10.1038/ncomms9442.
89. Barera G, Bonfanti R, Viscardi M, et al. Occurrence of Celiac Disease After Onset of Type 1 Diabetes: A 6-Year Prospective Longitudinal Study. *Pediatrics.* 2002;109(5):833-838. doi:10.1542/peds.109.5.833.
90. Gillett PM, Gillett HR, Israel DM, et al. High prevalence of celiac disease in patients with type 1 diabetes detected by antibodies to endomysium and tissue transglutaminase. *Can J Gastroenterol.* 2001;15(5):297-301. <http://europepmc.org/abstract/med/11381296>. Accessed May 25, 2016.
91. Bao F, Yu L, Babu S, et al. One third of HLA DQ2 homozygous patients with type 1 diabetes express celiac disease-associated transglutaminase autoantibodies. *J Autoimmun.* 1999;13(1):143-148. doi:10.1006/jaut.1999.0303.
92. Barker JM. Clinical review: Type 1 diabetes-associated autoimmunity: natural history, genetic associations, and screening. *J Clin Endocrinol Metab.* 2006;91(4):1210-1217. doi:10.1210/jc.2005-1679.

# Genetic correlations among behavioral and immune phenotypes - 37

93. Ventura A, Neri E, Ughi C, Leopaldi A, Città A, Not T. Gluten-dependent diabetes-related and thyroid-related autoantibodies in patients with celiac disease. *J Pediatr*. 2000;137(2):263-265. doi:10.1067/mpd.2000.107160.
94. Smyth DJ, Plagnol V, Walker NM, et al. Shared and distinct genetic variants in type 1 diabetes and celiac disease. *N Engl J Med*. 2008;359(26):2767-2777. doi:10.1056/NEJMoa0807917.
95. Cerutti F, Bruno G, Chiarelli F, Lorini R, Meschi F, Sacchetti C. Younger Age at Onset and Sex Predict Celiac Disease in Children and Adolescents With Type 1 Diabetes: An Italian multicenter study. *Diabetes Care*. 2004;27(6):1294-1298. doi:10.2337/diacare.27.6.1294.
96. Tursi A, Giorgetti GM, Brandimarte G, Elisei W. High prevalence of celiac disease among patients affected by Crohn's disease. *Inflamm Bowel Dis*. 2005;11(7):662-666. <http://www.ncbi.nlm.nih.gov/pubmed/15973121>. Accessed May 26, 2016.
97. Jandaghi E, Hojatnia M, Vahedi H, Shahbaz-Khani B, Kolahdoozan S, Ansari R. Is the Prevalence of Celiac Disease Higher than the General Population in Inflammatory Bowel Disease? *Middle East J Dig Dis*. 2015;7(2):82-87. <http://www.pubmedcentral.nih.gov/articlerender.fcgi?artid=4430796&tool=pmcentrez&rendertype=abstract>. Accessed May 4, 2016.
98. Tavakkoli H, Haghdani S, Adilipour H, et al. Serologic celiac disease in patients with inflammatory bowel disease. *J Res Med Sci*. 2012;17(2):154-158. <http://www.pubmedcentral.nih.gov/articlerender.fcgi?artid=3525033&tool=pmcentrez&rendertype=abstract>. Accessed May 26, 2016.
99. Festen EAM, Goyette P, Green T, et al. A meta-analysis of genome-wide association scans identifies IL18RAP, PTPN2, TAGAP, and PUS10 as shared risk loci for Crohn's disease and celiac disease. *PLoS Genet*. 2011;7(1):e1001283. doi:10.1371/journal.pgen.1001283.

# Genetic correlations among behavioral and immune phenotypes - 38

100. Binder V, Orholm M. Familial occurrence and inheritance studies in inflammatory bowel disease. *Neth J Med*. 1996;48(2):53-56. <http://www.ncbi.nlm.nih.gov/pubmed/8819799>. Accessed May 26, 2016.
101. Castro M, Rosati P, Lucidi V, Scotta MS, Papadatou B, Hadorn HB. Crohn's disease and ulcerative colitis with onset in the same year in two sisters. *J Pediatr Gastroenterol Nutr*. 1996;23(3):316-319. <http://www.ncbi.nlm.nih.gov/pubmed/8890085>. Accessed May 26, 2016.
102. Jones BJ, Gould SR, Pollock DJ. Coexistent ulcerative colitis and Crohn's disease. *Postgrad Med J*. 1985;61(717):647-649.  
<http://www.pubmedcentral.nih.gov/articlerender.fcgi?artid=2418301&tool=pmcentrez&rendertype=abstract>. Accessed May 26, 2016.
103. White CL, Hamilton SR, Diamond MP, Cameron JL. Crohn's disease and ulcerative colitis in the same patient. *Gut*. 1983;24(9):857-862.  
<http://www.pubmedcentral.nih.gov/articlerender.fcgi?artid=1420082&tool=pmcentrez&rendertype=abstract>. Accessed May 26, 2016.
104. Halme L, Paavola-Sakki P, Turunen U, Lappalainen M, Farkkila M, Kontula K. Family and twin studies in inflammatory bowel disease. *World J Gastroenterol*. 2006;12(23):3668-3672.  
<http://www.pubmedcentral.nih.gov/articlerender.fcgi?artid=4087458&tool=pmcentrez&rendertype=abstract>. Accessed May 26, 2016.
105. Lees CW, Barrett JC, Parkes M, Satsangi J. New IBD genetics: common pathways with other diseases. *Gut*. 2011;60(12):1739-1753. doi:10.1136/gut.2009.199679.
106. Jostins L, Ripke S, Weersma RK, et al. Host-microbe interactions have shaped the genetic architecture of inflammatory bowel disease. *Nature*. 2012;491(7422):119-124.  
doi:10.1038/nature11582.

107. Goyette P, Boucher G, Mallon D, et al. High-density mapping of the MHC identifies a shared role for HLA-DRB1\*01:03 in inflammatory bowel diseases and heterozygous advantage in ulcerative colitis. *Nat Genet.* 2015;47(2):172-179. doi:10.1038/ng.3176.
108. Wray NR, Lee SH, Kendler KS. Impact of diagnostic misclassification on estimation of genetic correlations using genome-wide genotypes. *Eur J Hum Genet.* 2012;20(6):668-674. doi:10.1038/ejhg.2011.257.
109. Nordsletten AE, Larsson H, Crowley JJ, Almqvist C, Lichtenstein P, Mataix-Cols D. Patterns of Nonrandom Mating Within and Across 11 Major Psychiatric Disorders. *JAMA psychiatry.* 2016;73(4):354-361. doi:10.1001/jamapsychiatry.2015.3192.
110. Burstyn I, Wang X, Yasui Y, Sithole F, Zwaigenbaum L. Autism spectrum disorders and fetal hypoxia in a population-based cohort: accounting for missing exposures via Estimation-Maximization algorithm. *BMC Med Res Methodol.* 2011;11:2. doi:10.1186/1471-2288-11-2.
111. Wang L, Himmelstein DS, Santaniello A, Parvin M, Baranzini SE. iCTNet2: integrating heterogeneous biological interactions to understand complex traits. *F1000Research.* 2015;4:485. doi:10.12688/f1000research.6836.2.
112. Himmelstein DS, Baranzini SE. Heterogeneous Network Edge Prediction: A Data Integration Approach to Prioritize Disease-Associated Genes. *PLoS Comput Biol.* 2015;11(7):e1004259. doi:10.1371/journal.pcbi.1004259.



|                                          | Morning Cortisol | Myeloid Neoplasm | Systemic Sclerosis | Coronary Artery Disease | Sarcoidosis | Psoriatic Arthritis | Systemic Lupus Erythematosus | Pulse Pressure | Diastolic Blood Pressure | Systolic Blood Pressure | Mean Arterial Blood Pressure | Rheumatoid Arthritis | Type 1 Diabetes | Atopic Dermatitis | Eosinophilic Esophagitis | IgA Nephropathy | Autoimmune Hepatitis | HIV-Associated Dementia | Celiac Disease | Ulcerative Colitis | Susceptibility to Tuberculosis | Large Vessel Stroke | Type 2 Diabetes | HIV Control | Crohn's Disease | All-Cause Ischemic Stroke |
|------------------------------------------|------------------|------------------|--------------------|-------------------------|-------------|---------------------|------------------------------|----------------|--------------------------|-------------------------|------------------------------|----------------------|-----------------|-------------------|--------------------------|-----------------|----------------------|-------------------------|----------------|--------------------|--------------------------------|---------------------|-----------------|-------------|-----------------|---------------------------|
| Epilepsy (Partial Seizures)              | -0.66            | 0.17             | 0.33               | 0.6                     | -0.22       | -0.21               | -0.05                        | 0.01           | -0.04                    | 0.03                    | -0.04                        | 0.15                 | -0.33           | 0.4               | -0.54                    | -1.02           | 0.02                 | 0.01                    | -0.39          | 0.42               | -0.3                           | 0.6                 | 0.62*           | 0.75        | 0.45            | >0.95*                    |
| Cigarettes (Ever Smoked Status)          | -0.02            | 0.03             | 0.16               | 0.24*                   | 0.01        | 0.21                | -0.09                        | 0              | -0.01                    | -0.02                   | -0.01                        | 0.14*                | -0.03           | -0.02             | 0.21                     | 0.09            | 0.31                 | -0.35                   | -0.09          | -0.02              | 0.31*                          | 0.71*               | -0.04           | 0.11        | -0.04           | 0.53*                     |
| Cigarettes (Per Day)                     | -0.8*            | -0.31            | 0.02               | 0.34*                   | -0.06       | 0.25                | -0.09                        | 0.02           | 0                        | -0.04                   | 0                            | 0.13                 | 0.09            | 0.24              | 0.06                     | -0.35           | -0.03                | 0.04                    | 0.04           | 0.02               | 0.5*                           | 0.71                | 0.27*           | 0.11        | 0.12            | 0.46*                     |
| Bipolar Disorder                         | -0.12            | 0.28             | -0.1               | -0.03                   | -0.02       | 0.2                 | 0.03                         | 0              | -0.01                    | 0.01                    | 0                            | -0.11                | -0.1            | 0.04              | -0.06                    | -0.09           | -0.04                | 0.38                    | 0.31*          | 0.25**             | -0.09                          | 0.19                | -0.02           | 0.13        | 0.14*           | 0.25                      |
| OCD                                      | -0.09            | -0.05            | -0.28              | -0.03                   | -0.05       | -0.04               | -0.02                        | 0.05           | 0.02                     | 0.04                    | 0.01                         | -0.11                | -0.28*          | 0.04              | -0.1                     | -0.15           | -0.11                | 0.18                    | 0.39*          | 0.29*              | -0.12                          | -0.04               | -0.07           | -0.13       | 0.02            | -0.05                     |
| Schizophrenia                            | -0.2             | 0.35*            | 0.12               | 0.02                    | -0.13       | 0.04                | -0.04                        | 0.01           | 0                        | 0.01                    | 0                            | 0.02                 | -0.09           | 0.03              | 0.11                     | -0.1            | -0.13                | 0.02                    | 0.09           | 0.12*              | 0.15*                          | 0.18                | -0.03           | 0.17*       | 0.09*           | 0.22*                     |
| Intracranial Volume                      | -0.06            | 0.05             | -0.56              | -0.32*                  | 0.18        | -0.1                | 0.08                         | -0.03          | -0.05                    | -0.03                   | -0.03                        | 0.1                  | 0               | -0.27             | -0.26                    | 0.34            | -0.11                | -0.61                   | -0.13          | 0.16               | -0.12                          | -0.42               | -0.2            | 0.13        | 0.29*           | -0.14                     |
| Autism                                   | 0.08             | -0.43*           | 0.01               | 0.02                    | 0.17        | -0.31               | -0.08                        | -0.01          | -0.03                    | -0.04                   | -0.01                        | -0.05                | 0.14            | 0.01              | -0.2                     | 0.4             | 0.35                 | -0.14                   | -0.03          | 0.01               | -0.06                          | -0.09               | -0.04           | 0.1         | -0.03           | -0.07                     |
| Birth Length                             | -0.38            | -0.43            | -0.21              | -0.15                   | -0.09       | -0.28               | 0.01                         | 0.04           | 0.03                     | 0.05                    | 0.04                         | -0.01                | 0.06            | 0.05              | -0.07                    | -0.11           | 0.06                 | -0.04                   | -0.04          | 0.15               | 0.07                           | 0.05                | -0.23*          | -0.17       | -0.03           | -0.05                     |
| MDD                                      | -0.4             | 0.04             | 0.41               | 0.08                    | -0.25       | 0.2                 | -0.05                        | 0.01           | -0.01                    | 0                       | -0.03                        | -0.05                | -0.17           | 0.03              | 0                        | -0.33           | -0.31                | 0.4                     | 0.2            | 0.17               | 0.05                           | 0.01                | 0.04            | -0.15       | -0.03           | 0.05                      |
| Anxiety-Spectrum Disorders               | 0.24             | -0.06            | -0.17              | 0.23                    | -0.29       | 0.17                | -0.11                        | -0.05          | -0.06                    | -0.04                   | -0.04                        | 0.08                 | 0.03            | 0.04              | 0.13                     | -0.47           | 0.44                 | 0.3                     | 0.11           | 0.29               | 0.06                           | 0.2                 | -0.16           | -0.47       | 0.05            | 0.07                      |
| ADHD                                     | -0.15            | 0.41             | -0.23              | 0.13                    | -0.26       | 0.32                | -0.04                        | 0.07           | 0.04                     | 0.06                    | 0.09                         | -0.03                | 0.15            | 0.13              | -0.07                    | 0.34            | 0.33                 | -0.3                    | -0.14          | 0.24               | 0.29                           | 0.82                | 0.14            | 0.12        | 0.17            | 0.27                      |
| Tourette Syndrome                        | 0.11             | 0.05             | 0.07               | 0.08                    | 0.07        | 0.22                | 0                            | -0.01          | 0                        | 0.01                    | 0.01                         | 0.09                 | -0.07           | -0.08             | 0.1                      | -0.24           | -0.02                | -0.34                   | 0.02           | 0.04               | 0.11                           | -0.08               | 0.11            | 0.03        | 0               | -0.03                     |
| Alzheimer's Disease                      | -0.03            | -0.2             | 0.47               | -0.01                   | -0.08       | -0.16               | -0.07                        | -0.05          | -0.03                    | -0.02                   | -0.04                        | -0.13                | -0.04           | 0.1               | 0.35                     | 0.13            | -0.16                | -0.16                   | 0.02           | -0.14              | 0.1                            | 0.13                | -0.02           | 0.14        | -0.06           | 0.2                       |
| Reading Disability                       | -0.28            | 0.13             | -0.44              | -0.23                   | -0.44       | 0.45                | -0.08                        | -0.04          | -0.04                    | -0.09                   | -0.04                        | 0.1                  | 0.19            | -0.09             | -0.47                    | -0.8            | 0.09                 | -0.3                    | -0.13          | -0.2               | 0.5                            | 0.68                | -0.07           | -0.33       | -0.37           | 0.29                      |
| Reading Disability / Language Impairment |                  | 0.21             | -0.68              | -0.07                   |             | 0.61                | 0.08                         | -0.14          | -0.17                    | -0.13                   | -0.19                        | 0.07                 | 0.22            | -0.14             | -0.5                     | 0.31            | 0.07                 | 0.79                    | 0.29           | 0.08               | 0.61                           | -0.3                | -0.46*          | -0.35       | 0.32            | -0.1                      |
| Birth Weight                             | -0.09            | -0.15            | -0.23              | -0.37*                  | 0.09        | -0.06               | -0.16                        | -0.02          | -0.02                    | 0                       | -0.03                        | -0.05                | 0.01            | -0.06             | -0.07                    | -0.31           | 0                    | -0.09                   | -0.04          | -0.09              | -0.16                          | -0.37               | -0.37*          | 0.1         | 0.07            | -0.17                     |
| Alcohol Dependence                       | 0.12             | -0.71            | 0.11               | 0                       | -0.23       | -0.44               | 0.23                         | 0.04           | 0.08                     | 0.07                    | 0.05                         | 0.1                  | 0.54            | -0.43             | 0.04                     | 0.04            | -0.01                | -0.52                   | 0.17           | -0.51              | 0.58                           | -0.43               | 0.04            | -0.52       | 0.01            | -0.15                     |
| Head Circumference                       | 0.03             | 0.2              | 0.28               | -0.09                   | -0.16       | 0.27                | 0.08                         | -0.07*         | -0.03                    | -0.04                   | -0.02                        | -0.05                | 0.24            | -0.31*            | -0.38                    | -0.06           | 0.29                 | 0.16                    | -0.09          | -0.24*             | -0.24                          | -0.19               | -0.17           | 0.01        | 0.02            | -0.1                      |



[illegible]



bioRxiv preprint doi: <https://doi.org/10.1101/070730>; this version posted August 21, 2016. The copyright holder for this preprint (which was not certified by peer review) is the author/funder, who has granted bioRxiv a license to display the preprint in perpetuity. It is made available under aCC-BY-NC-ND 4.0 International license.

|                                | All-Cause Ischemic Stroke | Large Vessel Stroke | Atopic Dermatitis | Myeloid Neoplasm | Type 2 Diabetes | Coronary Artery Disease | IgA Nephropathy | HIV Control | Eosinophilic Esophagitis | Morning Cortisol | HIV-Associated Dementia | Systemic Lupus Erythematosus | Psoriatic Arthritis | Sarcoidosis | Type 1 Diabetes | Susceptibility to Tuberculosis | Crohn's Disease | Systemic Sclerosis | Ulcerative Colitis | Rheumatoid Arthritis | Autoimmune Hepatitis | Celiac Disease | Mean Arterial Pressure | Systolic Blood Pressure | Pulse Pressure |
|--------------------------------|---------------------------|---------------------|-------------------|------------------|-----------------|-------------------------|-----------------|-------------|--------------------------|------------------|-------------------------|------------------------------|---------------------|-------------|-----------------|--------------------------------|-----------------|--------------------|--------------------|----------------------|----------------------|----------------|------------------------|-------------------------|----------------|
| Diastolic Blood Pressure       | 0.03                      | -0.04               | -0.04             | 0.11             | -0.02           | 0.01                    | -0.01           | 0.02        | 0.05                     | -0.02            | 0.02                    | -0.05                        | 0.02                | -0.04       | 0.03            | 0.01                           | -0.01           | -0.03              | 0.01               | 0                    | -0.02                | -0.03          | 0.97**                 | 0.89**                  | 0.7**          |
| Pulse Pressure                 | -0.05                     | -0.08               | -0.01             | 0.18*            | -0.04           | -0.02                   | -0.01           | -0.01       | 0.05                     | 0                | 0                       | -0.01                        | 0.07                | -0.08       | 0.02            | 0                              | -0.02           | -0.07              | -0.01              | 0                    | -0.01                | -0.08          | 0.77**                 | 0.88**                  |                |
| Systolic Blood Pressure        | -0.01                     | -0.06               | -0.04             | 0.15*            | -0.01           | -0.01                   | -0.02           | -0.01       | 0.03                     | -0.02            | 0.03                    | 0                            | 0.01                | -0.09       | 0.02            | 0                              | -0.02           | -0.01              | -0.01              | 0.01                 | -0.05                | -0.09          | 0.94**                 |                         |                |
| Mean Arterial Pressure         | 0.01                      | -0.02               | -0.02             | 0.15*            | -0.01           | -0.01                   | -0.04           | -0.02       | 0                        | -0.05            | -0.04                   | -0.05                        | -0.03               | -0.04       | 0.02            | 0.01                           | -0.01           | 0.01               | 0.02               | 0.02                 | -0.03                | -0.09          |                        |                         |                |
| Celiac Disease                 | -0.05                     | 0.14                | 0.22              | 0.22             | 0.07            | 0                       | 0.23            | -0.08       | 0.11                     | 0.21             | 0.25                    | 0.1                          | 0.26                | 0.33        | 0.32**          | 0.11                           | 0.31**          | 0.39*              | 0.3*               | 0.24*                | 0.27                 |                |                        |                         |                |
| Autoimmune Hepatitis           | 0.16                      | 0.43                | -0.03             | 0.27             | 0.06            | -0.07                   |                 | -0.59       | 0.77                     | 0.09             | -0.05                   | 0.12                         | -0.12               | -0.47       | 0.55*           | -0.15                          | -0.07           | 0.05               | 0.2                | 0.31                 |                      |                |                        |                         |                |
| Rheumatoid Arthritis           | 0.2                       | 0.28                | 0.01              | 0.22             | 0               | 0.06                    | -0.47*          | -0.07       | -0.06                    | 0.14             | 0.07                    | 0.01                         | -0.1                | -0.03       | 0.3*            | 0.15                           | 0.03            | 0.38*              | 0.13*              |                      |                      |                |                        |                         |                |
| Ulcerative Colitis             | -0.01                     | 0.13                | 0.07              | 0.02             | 0.02            | 0                       | -0.03           | 0.06        | -0.04                    | 0.21             | -0.02                   | -0.01                        | 0.02                | 0.12        | 0.1             | 0.24                           | 0.59**          | 0.17               |                    |                      |                      |                |                        |                         |                |
| Systemic Sclerosis             | 0.14                      | 0.03                | 0.05              | 0.04             | -0.05           | 0.12                    | -0.31           | -0.31       | -0.51                    | 0.7              | 0.78                    | -0.01                        | 0                   | -0.47       | 0.08            | 0.09                           | -0.22           |                    |                    |                      |                      |                |                        |                         |                |
| Crohn's Disease                | 0.07                      | -0.27               | 0.15              | 0.17             | -0.04           | 0.06                    | -0.47*          | 0.06        | 0.04                     | 0.03             | 0.36                    | -0.01                        | 0.32                | 0.18        | -0.04           | 0.2                            |                 |                    |                    |                      |                      |                |                        |                         |                |
| Susceptibility to Tuberculosis | 0.26                      | 0.57                | 0.08              | 0.23             | 0               | 0.23                    | -0.56           | -0.58*      | 0.18                     | 0.34             | 0.04                    | -0.06                        | 0.06                | -0.18       | 0.09            |                                |                 |                    |                    |                      |                      |                |                        |                         |                |
| Type 1 Diabetes                | -0.19                     | 0.1                 | -0.17             | -0.07            | -0.19           | -0.09                   | 0.39            | 0.05        | -0.08                    | 0.22             | 0.24                    | 0.02                         | -0.07               | 0.16        |                 |                                |                 |                    |                    |                      |                      |                |                        |                         |                |
| Sarcoidosis                    | -0.21                     | -0.06               | 0.45*             | 0.3              | 0.06            | -0.06                   | 0.59            | -0.04       | -0.03                    | -0.33            | -0.05                   | 0.06                         | 0.43                |             |                 |                                |                 |                    |                    |                      |                      |                |                        |                         |                |
| Psoriatic Arthritis            | 0.24                      | 0.06                | -0.02             | 0.37             | -0.05           | 0.3                     | 0.29            | -0.01       | -0.05                    | 0.3              | 0.72                    | -0.12                        |                     |             |                 |                                |                 |                    |                    |                      |                      |                |                        |                         |                |
| Systemic Lupus Erythematosus   | -0.03                     | 0.07                | 0.08              | 0.06             | 0.06            | -0.01                   | 0.13            | 0.04        | -0.35                    | -0.1             | 0.09                    |                              |                     |             |                 |                                |                 |                    |                    |                      |                      |                |                        |                         |                |
| HIV-Associated Dementia        | 0.03                      | 0.02                | -0.02             | -0.17            | 0.24            | 0.07                    | -0.75           | -0.26       | -0.02                    | -0.4             |                         |                              |                     |             |                 |                                |                 |                    |                    |                      |                      |                |                        |                         |                |
| Morning Cortisol               | -0.39                     | 0.02                | -0.14             | 0.04             | 0.18            | 0.13                    | 0.85            | -0.67       | -0.37                    |                  |                         |                              |                     |             |                 |                                |                 |                    |                    |                      |                      |                |                        |                         |                |
| Eosinophilic Esophagitis       | 0.3                       | 0.25                | -0.02             | -0.25            | 0.15            | -0.19                   | -0.09           | 0.29        |                          |                  |                         |                              |                     |             |                 |                                |                 |                    |                    |                      |                      |                |                        |                         |                |
| HIV Control                    | 0.14                      | 0.46                | 0.1               | 0.42             | 0.05            | 0.17                    | 0.3             |             |                          |                  |                         |                              |                     |             |                 |                                |                 |                    |                    |                      |                      |                |                        |                         |                |
| IgA Nephropathy                | -0.14                     | 0.18                | -0.66*            | -0.33            | -0.29           | 0                       |                 |             |                          |                  |                         |                              |                     |             |                 |                                |                 |                    |                    |                      |                      |                |                        |                         |                |
| Coronary Artery Disease        | 0.71**                    | 0.68*               | 0.17              | 0.13             | 0.43**          |                         |                 |             |                          |                  |                         |                              |                     |             |                 |                                |                 |                    |                    |                      |                      |                |                        |                         |                |
| Type 2 Diabetes                | 0.42*                     | 0.6                 | -0.02             | 0.23             |                 |                         |                 |             |                          |                  |                         |                              |                     |             |                 |                                |                 |                    |                    |                      |                      |                |                        |                         |                |
| Myeloid Neoplasm               | 0.64                      | 0.94                | 0.29              |                  |                 |                         |                 |             |                          |                  |                         |                              |                     |             |                 |                                |                 |                    |                    |                      |                      |                |                        |                         |                |
| Atopic Dermatitis              | 0.38                      | 0.54                |                   |                  |                 |                         |                 |             |                          |                  |                         |                              |                     |             |                 |                                |                 |                    |                    |                      |                      |                |                        |                         |                |
| Large Vessel Stroke            | 0.92**                    |                     |                   |                  |                 |                         |                 |             |                          |                  |                         |                              |                     |             |                 |                                |                 |                    |                    |                      |                      |                |                        |                         |                |

## Figure Titles and Legends

Figure 1. Genetic correlations between the set of brain/behavior phenotypes and the set of immune/inflammatory phenotypes.

Figure 1 Legend. A modified heatmap was constructed to depict the strength of genetic correlations between the set of brain/behavioral phenotypes and the set of immune/inflammatory phenotypes. The extended MHC region was included for these analyses. Brain/behavioral phenotypes are displayed in rows and immune/inflammatory phenotypes are displayed in columns. The ordering of phenotypes in rows and columns is based on hierarchical clustering. The coefficient for genetic correlation is depicted in each cell. Cells are colored for genetic correlations reaching an uncorrected  $p$ -value  $< 0.10$ . Genetic correlations reaching an uncorrected  $p$ -value  $< 0.05$  are denoted with \*, while correlations surviving Benjamini-Hochberg correction (for the total number of unique tests depicted in the Figure) are denoted with \*\*. The full list of test statistics supporting this table are provided in Supplementary Table 3. Additionally, these test statistics were recalculated in the absence of the extended MHC region in Supplementary Table 4.

Figure 2. Genetic correlations amongst the set of brain/behavior phenotypes.

Figure 2 Legend. A modified heatmap was constructed to depict the strength of genetic correlations between amongst the set of brain/behavioral phenotypes. The extended MHC region was included for these analyses. The ordering of phenotypes in rows and columns is based on hierarchical clustering. The coefficient for genetic correlation is depicted in each cell. Cells are colored for genetic correlations reaching an uncorrected  $p$ -value  $< 0.10$ . Genetic correlations reaching an uncorrected  $p$ -value  $< 0.05$  are denoted with \*, while correlations surviving Benjamini-Hochberg correction (for the total number of unique tests depicted in the Figure) are denoted with \*\*. The full list of test statistics supporting this table are provided in Supplementary Table 5. Additionally, these test statistics were recalculated in the absence of the extended MHC region in Supplementary Table 6.

Figure 3. Genetic correlations amongst the set of immune/inflammatory phenotypes.



Figure 3 Legend. A modified heatmap was constructed to depict the strength of genetic correlations between amongst the set of immune/inflammatory phenotypes. The extended MHC region was included for these analyses. The ordering of phenotypes in rows and columns is based on hierarchical clustering. The coefficient for genetic correlation is depicted in each cell. Cells are colored for genetic correlations reaching an uncorrected  $p$ -value  $< 0.10$ . Genetic correlations reaching an uncorrected  $p$ -value  $< 0.05$  are denoted with \*, while correlations surviving Benjamini-Hochberg correction (for the total number of unique tests depicted in the Figure) are denoted with \*\*. The full list of test statistics supporting this table are provided in Supplementary Table 5. Additionally, these test statistics were recalculated in the absence of the extended MHC region in Supplementary Table 6.
